# Supplementary material
Source: PubMed Central journal article supplement (PMC11308298)
Supplement: NIHMS1998622-supplement-Supplementory_Tables.pdf [file NIHMS1998622-supplement-Supplementory_Tables.pdf]

**S. Table 1: List of PCR primers used for generation of ORF sequencing library.**

|                     |        | Sequence                                             |
|---------------------|--------|------------------------------------------------------|
| <b>First Round</b>  | ORF_F1 | ACTGGCTTTATATATCTTGTGGAAAGG                          |
|                     | ORF_F2 | CAGTGCTTTATATATCTTGTGGAAAGG                          |
|                     | ORF_F3 | TGACGCTTTATATATCTTGTGGAAAGG                          |
|                     | ORF_F4 | GTCAGCTTTATATATCTTGTGGAAAGG                          |
|                     | ORF_R1 | ACTGGTAATCCAGAGGTTGATTGTC                            |
|                     | ORF_R2 | CAGTGTAATCCAGAGGTTGATTGTC                            |
|                     | ORF_R3 | TGACGTAATCCAGAGGTTGATTGTC                            |
|                     | ORF_R4 | GTCAGTAATCCAGAGGTTGATTGTC                            |
| <b>Second Round</b> | AmpFW_ | 5'-TCGTCGGCAGCGTCAGATGTGTATAAGAGACAGGCTTTATATATC-3'  |
|                     | AmpRV_ | 5'-GTCTCGTGGGCTCGGAGATGTGTATAAGAGACAGGTAATCCAGAGG-3' |

**S. Table 2: List of western blot antibodies used in this study.**

| <b>Antibody</b> | <b>Company</b>            | <b>Catalog Number</b> | <b>Dilution</b> |
|-----------------|---------------------------|-----------------------|-----------------|
| AKT             | Cell Signaling Technology | 4685                  | 1:1000          |
| pAKT S473       | Cell Signaling Technology | 9271                  | 1:1000          |
| $\beta$ -actin  | Cell Signaling Technology | 3700                  | 1:1000          |
| IFN $\gamma$    | Cell Signaling Technology | 8455                  | 1:1000          |
| PD-L1           | Cell Signaling Technology | 13684                 | 1:1000          |
| pSTAT1 Y701     | Cell Signaling Technology | 9167                  | 1:1000          |
| pSTAT1 S727     | Cell Signaling Technology | 8826                  | 1:1000          |
| STAT1           | Cell Signaling Technology | 14994                 | 1:1000          |
| V5 Tag          | Cell Signaling Technology | 80076                 | 1:1000          |

**S. Table 3: List of qPCR primers used in this study.**

| Target     | Forward Primer (5'→3')  | Reverse Primer (5'→3')  |
|------------|-------------------------|-------------------------|
| B3GAT1     | GTAATGAGGAGCCGTGGGTG    | GTCACTGCCCTCATCCTTATGT  |
| CHSY       | TCCGAGCTGAAGCGAGCG      | ACAGATGTGTCAGAACCCTCAC  |
| DDX21      | CTGAACCGGACTGTAACCCC    | TCACTCCTCGGCCTTTGAGA    |
| FGF2       | GAGCGACCCTCACATCAAGCTA  | CGTTTCAGTGCCACATACCAA   |
| FGFR1      | AACCAAACCGTATGCCCGTA    | TGCTGCCGTACTIONCATTCTCC |
| FGFR2      | TGACCAAACGTATCCCCCTG    | TGCCCAGTGTGTCAGCTTATCTC |
| FGFR3      | CCTCGGGAGATGACGAAGAC    | CTGATGCCGCAGCTTGATG     |
| FGFR4      | TGCAGAATCTCACCTTGATTACA | TGTGTCCAGTAGGGTGCTTG    |
| GALNT14    | ACCTGAAGTGCAGACCCCTA    | AGCAGTGTGCATCTGACTTG    |
| HECW2      | CTTAGAACTCCAGACCCGCC    | ACAGATTTTTATCTCCGGTTCCA |
| IFNA1      | ACTCATAACCAGGTCACGC     | CAGTGTAAGGTGCACATGACG   |
| IFNB1      | GCACTGGCTGGAATGAGACTA   | CACTCTGACTATGGTCCAGGC   |
| MYC        | TACAACACCCGAGCAAGGAC    | CTAACGTTGAGGGGCATCGT    |
| NOP56      | TTCGTCTGGTGGCCTTTTGT    | GAAGTGCAGACGAACTCCTCG   |
| ODC1       | TGTTTTTGACATGGGGGCTG    | TGTCCAACGCTGGGTTGATT    |
| ST3GAL6    | GTGTTTACTTCTGCCGCCTG    | CATGGCTGGCTCACCTTTCG    |
| ST6GALNAC5 | TGGCGGACCACAAGGAAGATA   | TAAAGCGGTGATGACTGCC     |

**S. Table 4: Sanger sequencing of selected clones serially sorted for PD-L1<sup>high</sup> expression.**

| <b>Clone #</b> | <b>ORF</b> |
|----------------|------------|
| <b>A</b>       | SLC10A7    |
| <b>B</b>       | CTH        |
| <b>1</b>       | SENP8      |
| <b>2</b>       | SENP8      |
| <b>3</b>       | PPIAL4G    |
| <b>4</b>       | CNR2       |
| <b>5</b>       | DPF3       |
| <b>6</b>       | TMEM25     |
| <b>7</b>       | ZNF550     |

**S. Table 5: Enriched ORFs in PD-L1<sup>high</sup> sorted population.**

| Barcode                  | Gene      | Unsorted Read Count | PD-L1 <sup>high</sup> Read Count | Total Read Count Normalized Ratio | Log2 Normalized Ratio |
|--------------------------|-----------|---------------------|----------------------------------|-----------------------------------|-----------------------|
| ACTTCATCAGCAGTGAGAATTCCA | ERO1L     | 7                   | 10889                            | 1208                              | 10.2                  |
| CACGACGACATGGGTATATCGAA  | NUP85     | 3                   | 4378                             | 1134                              | 10.1                  |
| AGATCAACGCGCCATACGCACAT  | OR2L2     | 15                  | 19065                            | 987                               | 9.9                   |
| GCAGGATATTGGTTACATCGACCT | TDP2      | 120                 | 111075                           | 719                               | 9.5                   |
| CCGAACACCCTCTAACTCGGCCTC | ATF7      | 352                 | 290057                           | 640                               | 9.3                   |
| AAGAATATGTGGTAGTGCTTGATG | AMT       | 48                  | 29441                            | 476                               | 8.9                   |
| TGTACACTCGGTGTGATTTGTAGT | GSTO1     | 245                 | 146097                           | 463                               | 8.9                   |
| GATCGTATTAAGTAGGCTAATGGC | SPACA3    | 5                   | 2513                             | 390                               | 8.6                   |
| AATTCCCATTGTGATTGGGCCTGC | ZNF101    | 52                  | 19317                            | 289                               | 8.2                   |
| ACCACTAAGGGACAGCAAACCTTC | HNF4G     | 158                 | 53187                            | 261                               | 8.0                   |
| TGGCTCATAGCACCATAACCTCCT | PPP1R2    | 99                  | 31497                            | 247                               | 7.9                   |
| CTTAGTCTTCATCCTCGTCTTATT | FAM209A   | 1                   | 293                              | 228                               | 7.8                   |
| ATGAGCCTTATTGGAGGCTGAAAT | LINC00242 | 129                 | 33748                            | 203                               | 7.7                   |
| CCACCTTCCCACCCTCACGAACGA | ENOSF1    | 9                   | 2159                             | 186                               | 7.5                   |
| AGAAGGCACGCTTCAGCCGCGCCG | ZFHX2     | 216                 | 48351                            | 174                               | 7.4                   |
| ATTATGTTTAGAATAATATCTAG  | ZNF581    | 132                 | 28361                            | 167                               | 7.4                   |
| AACCGATGCCTTAAAGGGTAGTCC | TALDO1    | 29                  | 5796                             | 155                               | 7.3                   |
| TGTACCCGCGAGTCTCCACACCGT | HTR2C     | 1                   | 178                              | 138                               | 7.1                   |
| TTTAAGATTTCTGGGCTTCCCCCT | ABHD12B   | 5                   | 850                              | 132                               | 7.0                   |
| ACTAAATTCAGTGATGCCACATAC | C8G       | 93                  | 15030                            | 126                               | 7.0                   |
| TAAGCGAATAGTACCAGGGGTTGA | DNASE1L1  | 88                  | 13212                            | 117                               | 6.9                   |
| CAGTGACTTATCGTATTTGTCTGA | DNM1      | 2                   | 290                              | 113                               | 6.8                   |
| CTGATTCAGACAACGAGCATCAAC | CTSL1     | 125                 | 16125                            | 100                               | 6.6                   |
| TCTCTTGGGAGGTGCATTCGATCA | PPIAL4G   | 122                 | 15117                            | 96                                | 6.6                   |
| GCCCATCCAGCATGGCGGATTCCC | EFNA1     | 87                  | 10319                            | 92                                | 6.5                   |
| ACAGCACTAGCAGGAACCTGGACT | TMED4     | 203                 | 22053                            | 84                                | 6.4                   |
| CAACACGAGGCCATACATTGCTTA | PRKAA1    | 23                  | 2471                             | 83                                | 6.4                   |
| TCATTGCTGTACATCTAGAGTTCG | S100A1    | 6                   | 618                              | 80                                | 6.3                   |
| CTGTATAGACTGGCCGTCGAACTT | KRT23     | 12                  | 1225                             | 79                                | 6.3                   |
| ATCGCTCCCTTCACAGTAAGCATA | C1ORF49   | 53                  | 5353                             | 78                                | 6.3                   |
| TAGACGGTTTTATACGCTCAGCCA | EFHD1     | 100                 | 9775                             | 76                                | 6.2                   |
| TAGAGGAAAGAATACAGGATCTAC | DLX6-AS1  | 397                 | 38327                            | 75                                | 6.2                   |
| TAACTTGACGAAAGGACCCTGTGC | EIF4B     | 14                  | 1328                             | 74                                | 6.2                   |
| CAAATCGCCTGACCCCAATAAAGA | BOD1P     | 12                  | 1095                             | 71                                | 6.1                   |
| AACCCGCAACATGCCCGGTGGTCA | CPEB1     | 5                   | 436                              | 68                                | 6.1                   |
| TAGTACAAAAGCTTAACAGCGTT  | ATCAY     | 26                  | 2176                             | 65                                | 6.0                   |
| CTAGACATACATGATGCGGCACCT | ADORA2B   | 92                  | 7575                             | 64                                | 6.0                   |
| CTATAAGAGCTCAATCACTGCGGA | TCN1      | 10                  | 804                              | 62                                | 6.0                   |

|                              |               |     |       |    |     |
|------------------------------|---------------|-----|-------|----|-----|
| TTAGCTCCGTGCCGCGATATGAAA     | BDNF          | 36  | 2867  | 62 | 6.0 |
| AGAGTCCATTCTCCCACTATGCCC     | REP15         | 227 | 17349 | 59 | 5.9 |
| ACTTTTCCCGCTTGTCTGCCCCC      | GRK6          | 1   | 74    | 57 | 5.8 |
| CCTGTTTCCCCCGACCCTGAGTCG     | RASA3         | 2   | 138   | 54 | 5.7 |
| AATTAAGTGTTCATCCGAGTCTTT     | ZCCHC9        | 1   | 68    | 53 | 5.7 |
| GTGTTCCCCGCGGTCTGGCGAACG     | TP73-AS1      | 81  | 5274  | 51 | 5.7 |
| TTAACTTCAATTCTCTTTTAAATT     | DIMT1         | 21  | 1294  | 48 | 5.6 |
| CCTGGTTGCCCTCTAGGGCTTGA      | DPY19L2P1     | 151 | 8998  | 46 | 5.5 |
| GCCACTTTGTAGGCGCCATTTCGAC    | CAPN1         | 1   | 59    | 46 | 5.5 |
| CACTATATCAATGTTTCCATTTCGT    | FAM78A        | 8   | 462   | 45 | 5.5 |
| TACCTGATAATGGCACCATGCAA      | DEFB129       | 259 | 13571 | 41 | 5.3 |
| CCAATCAACCGGGCCCCGAAACTC     | CDK16         | 10  | 522   | 41 | 5.3 |
| CACCCTATCGTCGAGGTCGACTGC     | PRAMEF5       | 63  | 3288  | 41 | 5.3 |
| TCAGCCTACCATCAACTTCGTATT     | SET           | 1   | 51    | 40 | 5.3 |
| AAGCTGGGATTACTTCTGTACGGC     | EEF1G         | 133 | 6536  | 38 | 5.3 |
| AAGTGGGAGAGTAAGTGCCTGGTC     | PRB4          | 371 | 18019 | 38 | 5.2 |
| TTCGTAATCCGGTTCCTGTGCTTC     | RHOG          | 213 | 10224 | 37 | 5.2 |
| GGCATATGTCCTGACATCTGGCAG     | CHIA          | 111 | 5244  | 37 | 5.2 |
| CCGCATAAGGCCAGATCGGTGCTC     | CAMLG         | 43  | 1997  | 36 | 5.2 |
| GATACCATACGACATCCTGTTAC      | CCNL1         | 13  | 598   | 36 | 5.2 |
| ACCTACCTCCTGACACATCAACTT     | CNBP          | 216 | 9539  | 34 | 5.1 |
| CCTCACAGTACTTGCCATCCTGAC     | RBX1          | 278 | 11605 | 32 | 5.0 |
| AGCAGAACCCTTAAAAGCTCGAGT     | CST8          | 227 | 9049  | 31 | 5.0 |
| TGTTGAATCGGTAACGATGACCTG     | CDX4          | 24  | 942   | 30 | 4.9 |
| TGCCCCTGTTCTCCATCAGGTTTA     | TRIM72        | 1   | 39    | 30 | 4.9 |
| AACTATTAGTGCCCGAGTCATCCC     | CD82          | 57  | 2195  | 30 | 4.9 |
| GTTTGTCTAAACATTGCGACATC      | ZNF578        | 9   | 339   | 29 | 4.9 |
| TACACACCCTTCTTAGCCATTCAT     | <i>NFKB1A</i> | 242 | 9003  | 29 | 4.9 |
| TCGGAAACCAGAACTATTAGTATA     | RHPN1         | 3   | 111   | 29 | 4.8 |
| CTACAATTTCTGTTCTGCACCTTA     | ASIC1         | 18  | 659   | 28 | 4.8 |
| TCCAACACAGCGAGCCTCTTGGCT     | TNFSF11       | 79  | 2841  | 28 | 4.8 |
| CACGCCACCCGTGCCAGGACTAC      | OR7E91P       | 45  | 1617  | 28 | 4.8 |
| TCAAGATACCCTTGACCAAATGTT     | ZNF550        | 25  | 883   | 27 | 4.8 |
| ATTAACAACCATCCTGTCCTGGCC     | C1QTNF2       | 255 | 8720  | 27 | 4.7 |
| TTTAGACTGGTTTTGTAAGAGACC     | UFSP1         | 152 | 5090  | 26 | 4.7 |
| ACCGAGTCCGAATAGTTTATTCAG     | HOOK1         | 23  | 764   | 26 | 4.7 |
| GTCAACTGGGGCATCTGGCACCTC     | ARHGEF26      | 222 | 7316  | 26 | 4.7 |
| AGCTCAATCAACTCAACCTTACAA     | KLRC1         | 101 | 3228  | 25 | 4.6 |
| CCCTATGAAGGCCTGAAGCGGGCA     | METTL21A      | 464 | 14778 | 25 | 4.6 |
| GCACCGATACCGATCCCCCAATC      | GALNT10       | 147 | 4385  | 23 | 4.5 |
| GTAGGTGCAAACGCGAGACAGACC     | MAS1          | 168 | 4858  | 22 | 4.5 |
| TTCAAAGAACAGGAACGGGCTCAT     | FMN1          | 33  | 943   | 22 | 4.5 |
| CTGGCATGCTAACCAAGTACACGC     | CDH26         | 306 | 8694  | 22 | 4.5 |
| CAAAGGCCTAAGAGGACAGAGAG<br>T | ORAI1         | 185 | 5160  | 22 | 4.4 |

|                           |            |     |      |    |     |
|---------------------------|------------|-----|------|----|-----|
| TCTTGCTACCGGTGACATTCTCCG  | KCNJ15     | 51  | 1420 | 22 | 4.4 |
| TGAATTGTCGCCCCAGATACACC   | ZCCHC10    | 208 | 5745 | 21 | 4.4 |
| GCCTAATTCGTGACGTCCCCAAAT  | DCLRE1B    | 10  | 276  | 21 | 4.4 |
| TTGCCGAACCGCGCACTCAGAATC  | PIAS4      | 15  | 385  | 20 | 4.3 |
| ACGCGCCCGATCCCCACTTCCAAT  | ANXA11     | 74  | 1865 | 20 | 4.3 |
| ATAGAACGTGACCAATCGTTGTTT  | PIPOX      | 20  | 491  | 19 | 4.3 |
| GCTGTAGTGTGCCCGCTGAGGCCT  | PRKCZ      | 9   | 218  | 19 | 4.2 |
| ACCAGAATGATACCTTGATCTCAC  | GPBAR1     | 8   | 191  | 19 | 4.2 |
| GTGATACCTCCTTCTCCCGACCCA  | ASPDH      | 65  | 1547 | 18 | 4.2 |
| CCATTCCACCTAGAGAATTTATAC  | P2RX2      | 1   | 23   | 18 | 4.2 |
| CGTCATTATATTCTCTCCAGGAT   | KIAA0284   | 55  | 1233 | 17 | 4.1 |
| ACTTCCTGGAGAGGGGCTAACAGT  | WBP2NL     | 200 | 4481 | 17 | 4.1 |
| CTTAATAAGTCGAAATCCGAGGAC  | GPR139     | 13  | 290  | 17 | 4.1 |
| TGGCCCATCAAACGAGCCTTATTT  | AKR1B1     | 46  | 1011 | 17 | 4.1 |
| GAGGATGTCACACCACGATATCAT  | SLC22A11   | 27  | 581  | 17 | 4.1 |
| CTTGCCCCATCACCCATATTTCT   | CMTM2      | 339 | 7270 | 17 | 4.1 |
| ACACCGGTCTGCTCCCGATCGGGC  | TNFAIP2    | 85  | 1805 | 16 | 4.0 |
| TCGACGGACATGGGAAAGATCAAC  | REEP5      | 142 | 2956 | 16 | 4.0 |
| AACCTTACTAATAGCTTGTTGCC   | CCDC138    | 9   | 187  | 16 | 4.0 |
| AGCAATCTTACCGGAGCAGTTACA  | CEACAM8    | 18  | 373  | 16 | 4.0 |
| TCAGAGCAATATCCATAATCAGT   | RUVBL1     | 109 | 2242 | 16 | 4.0 |
| TTGATTTCCAGTGCAGAGAAGACCG | HMX2       | 16  | 316  | 15 | 3.9 |
| ATTGTCAATGGTTTGATCTCAGCA  | FOS        | 99  | 1952 | 15 | 3.9 |
| TTCCGCCCTGTATTCCGGTACGTC  | ENTPD2     | 8   | 156  | 15 | 3.9 |
| TATATGTCTGAATACTCCGATCAG  | OR14J1     | 4   | 78   | 15 | 3.9 |
| AAGCACATCCGTTGTGCGCACAGA  | BAMBI      | 19  | 359  | 15 | 3.9 |
| ATCGAGGGTCCACGTACCTGTACT  | RABL2A     | 113 | 2132 | 15 | 3.9 |
| CATCACATATAAATGAGGACATGG  | STRN       | 10  | 184  | 14 | 3.8 |
| ACCTTAGACGCTCCTTTTCGCTGA  | TAC1       | 97  | 1764 | 14 | 3.8 |
| TCTCATCTGTCCCTGGCCCCGTAA  | TERF2IP    | 16  | 285  | 14 | 3.8 |
| ACGCCGAGATCCGCATAAGCCGTA  | GLO1       | 76  | 1350 | 14 | 3.8 |
| CCATCCTTACCAGAAACAACCTCCC | UBE2W      | 102 | 1800 | 14 | 3.8 |
| ATCACAACCTATCGTTATTTACCGC | KCNAB2     | 11  | 194  | 14 | 3.8 |
| GGTCGAATGGTCGCATTAGATTCC  | HIST2H2AA3 | 91  | 1592 | 14 | 3.8 |
| CATCATTGCCTCTATCAACAATA   | ZNRD1      | 82  | 1424 | 13 | 3.8 |
| ACTTGCATCCTGCCCCAGAGGCTG  | OR56B1     | 8   | 132  | 13 | 3.7 |
| TCTGAAAAACTCCGAAATAGCAGA  | HINFP      | 47  | 768  | 13 | 3.7 |
| AACTACTATGGGGCCTTGCACCTT  | RHBDD2     | 160 | 2599 | 13 | 3.7 |
| TCGACAGCACTCACGGGTTAGCAG  | LINC00482  | 48  | 767  | 12 | 3.6 |
| TAATTAACCGTTTGAAGTCAACT   | SAMD10     | 44  | 690  | 12 | 3.6 |
| ACTGAGCAAGTCCCCCTTCTCTATA | C7ORF42    | 112 | 1755 | 12 | 3.6 |
| GTTCCGAGAGGCTCTATGGTTGGG  | DUSP10     | 61  | 953  | 12 | 3.6 |
| CAGCCTTAAACAGACTTCATAAGC  | HSPA8      | 56  | 865  | 12 | 3.6 |
| CCGCAGGTCTTCTGTTTTTAGGAT  | FAM71B     | 17  | 262  | 12 | 3.6 |
| TTCTAACCCCTTTGTAGACCAATG  | HIST2H2BA  | 443 | 6778 | 12 | 3.6 |

|                           |                |     |      |    |     |
|---------------------------|----------------|-----|------|----|-----|
| CTGAGGCAGCGTCGGCTATTCGCA  | MST4           | 217 | 3280 | 12 | 3.6 |
| AGCCAATTATCCTGTTGTGTCCCG  | ANAPC16        | 222 | 3188 | 11 | 3.5 |
| GTTTCGCTAAATCCGTTCTCCCGGC | LRRC52         | 74  | 1061 | 11 | 3.5 |
| ACGCTCAATGAGTGCACGCTCACC  | PCSK9          | 94  | 1324 | 11 | 3.5 |
| TTGTCTTCTATTATGAGTTGCGTA  | CXCL5          | 43  | 596  | 11 | 3.4 |
| GCTTCTCTAGTGAAAGTAATTTTG  | FMR1           | 14  | 189  | 10 | 3.4 |
| ATAACCAAGTTATGGAAACAGGCC  | CPSF4          | 97  | 1305 | 10 | 3.4 |
| GGGACCATAATGGCGATCCATTAG  | AREG           | 6   | 80   | 10 | 3.4 |
| TCCCGTGTGAATATTTTGGCCTTT  | DHPS           | 68  | 903  | 10 | 3.4 |
| AGTTGTGCCCTCGGAGTGCGCCA   | GPAA1          | 2   | 26   | 10 | 3.3 |
| CCTAGACTGTACCTCCCATGGACC  | COQ4           | 219 | 2814 | 10 | 3.3 |
| TAGTGTTCCCTCCATCTATCGAAG  | TMPRSS12       | 6   | 77   | 10 | 3.3 |
| GTAGTACAATACCCCGAGTCGGAA  | GJA4           | 35  | 443  | 10 | 3.3 |
| CATGCGCTACTTAATTGAAGTGCC  | BCMO1          | 13  | 163  | 10 | 3.3 |
| TTATATTCCCAGTAGGGCTAGGAG  | CLDN7          | 12  | 148  | 10 | 3.3 |
| ACGATCAACCTGCGTTTCCCGCA   | APOPT1         | 175 | 2091 | 9  | 3.2 |
| CGCAGGTTGCACAGAATGCTCGGT  | EPB41L1        | 27  | 319  | 9  | 3.2 |
| CGGCATTCCGTCAATTGCCGA ACT | PMCH           | 67  | 777  | 9  | 3.2 |
| CGCAAATACTTTCGGATGGCATCC  | C1ORF64        | 212 | 2424 | 9  | 3.2 |
| TCAGTACTAGGAAGGTCTCTACGA  | MAX            | 73  | 828  | 9  | 3.1 |
| GTCCGTTTAAGAACGTTTCGGCAC  | C11ORF31       | 158 | 1789 | 9  | 3.1 |
| TTATCATTCTGGGGATGGCAGGAG  | PLEKHB2        | 124 | 1401 | 9  | 3.1 |
| CCCTCCCAGTGTTGACTGTATTCC  | GCNT3          | 60  | 667  | 9  | 3.1 |
| GGGCGTGAGATAAAAGTGAAAAT   | MTERFD2        | 85  | 929  | 8  | 3.1 |
| TAGGGTATAATAGATGATCCTGCC  | ST6GALNAC<br>6 | 29  | 315  | 8  | 3.1 |
| CTTAGCCAATGGGTGCATCCGTGG  | OR51G2         | 18  | 195  | 8  | 3.1 |
| AGCAGACGTTGCATGCGCAATTCA  | RANBP10        | 67  | 718  | 8  | 3.1 |
| CCGCAGTCCCCTTCGCCGGAGATC  | GFOD2          | 42  | 446  | 8  | 3.0 |
| GCATGGGCCGAGCGCATTTTCGCGG | FAM27E2        | 275 | 2793 | 8  | 3.0 |
| ATTCGCGGCTATGCAGGGGCACTA  | RHBDL2         | 5   | 49   | 8  | 2.9 |
| CATAGTAGCGCACTACAGTTTAGC  | REEP6          | 26  | 251  | 7  | 2.9 |
| ACTTCGACGTCTGGAACCAGTCTC  | C1ORF158       | 90  | 857  | 7  | 2.9 |
| TTTGGCATCCCCCTGTAGTGCGC   | ZNF689         | 71  | 675  | 7  | 2.9 |
| ACAGGATACATGATTACATGCCCC  | SHMT1          | 11  | 102  | 7  | 2.8 |
| TCTAAACGAACGCATCCCTGCCCT  | PF4V1          | 34  | 313  | 7  | 2.8 |
| TATAAGGCACCCAATAACCGAGAT  | RORB           | 70  | 638  | 7  | 2.8 |
| CTGCGACGCGGTACTGACGAATAT  | C11ORF63       | 74  | 659  | 7  | 2.8 |
| ACTGGGTACACAGTAGTGATTACCC | TGIF2          | 317 | 2810 | 7  | 2.8 |
| CTTCGTGACAATACCTTTCGGAAT  | CDK2           | 11  | 97   | 7  | 2.8 |
| GCCCAGCTACACAACCAAGTTGCC  | PYY            | 488 | 4288 | 7  | 2.8 |
| GGGTCAGTAGTGATGTACCAGTA   | LOC554223      | 53  | 457  | 7  | 2.7 |
| GCAAAGACACGTAGACGATAAGCC  | FAM83A         | 62  | 515  | 6  | 2.7 |
| ACACAAACGCTCATCAGCCCTGGC  | CD300LB        | 127 | 1048 | 6  | 2.7 |
| TGACGTCCGTCCCAGACCGTCTGC  | GRB7           | 39  | 314  | 6  | 2.6 |



|                          |               |     |      |   |     |
|--------------------------|---------------|-----|------|---|-----|
| GAATTTGTCGACGTGCTTTGAGGA | TRIM52        | 65  | 521  | 6 | 2.6 |
| CATATCACCAAATTTATTCCGAAC | KIRREL3-AS3   | 107 | 851  | 6 | 2.6 |
| TTGACTTTGATGTATCAGATCTAC | <b>CD300C</b> | 162 | 1253 | 6 | 2.6 |
| ACAAATTCCGAGATAGACGTCCAA | DCTN3         | 127 | 981  | 6 | 2.6 |
| CCAGAATTACGCACTTGTCGATGT | SLC39A7       | 45  | 345  | 6 | 2.6 |
| TCTCAGTCTCCACTCGTCTTGAGA | SUOX          | 50  | 376  | 6 | 2.5 |
| ACAAGATATTAACGCTCGGCTGGA | KIAA1467      | 19  | 139  | 6 | 2.5 |
| ATGACTGTGTTAGGCGGCTCACGG | TIMM17A       | 128 | 915  | 6 | 2.5 |
| TAGTATGACGCGAGCAGTTCTAAA | SH2D2A        | 123 | 871  | 6 | 2.5 |
| CACTTATCGGGGTCATTGAGGTC  | ZCCHC2        | 44  | 310  | 5 | 2.5 |
| TATCCCCCTGGAGTCGCAGTCCT  | LOC541471     | 399 | 2808 | 5 | 2.5 |
| AATGATGTAGTCCGTCATCCTCAA | LINGO1        | 3   | 21   | 5 | 2.4 |
| TTCCCGTTCCTAGAAGGGGCAAA  | CHRM5         | 2   | 14   | 5 | 2.4 |
| TCCCGAGATTACATTTGAGACAAT | ADA           | 48  | 335  | 5 | 2.4 |
| CGTTCACGTCATAGCGTTCCCGAA | AKR1C2        | 31  | 215  | 5 | 2.4 |
| CAAGAGCTACGATCTACTCCCCA  | NR1D2         | 47  | 321  | 5 | 2.4 |
| GACGGCAACTTCGGGAATCACTAG | PNMT          | 124 | 839  | 5 | 2.4 |
| CACGCCAAAGAAACCTCGAAGCTG | CHCHD7        | 680 | 4594 | 5 | 2.4 |
| AGTAGGTTCAACCGCAAACAGATC | NOA1          | 19  | 126  | 5 | 2.4 |
| GTCAACGACCTAAGGAACTCGTGC | LAIR1         | 21  | 138  | 5 | 2.4 |
| AAAAATGGGCGCTCTGAGACACAC | ZNF680        | 11  | 72   | 5 | 2.3 |
| TGTAGAAGTTTCTGGATAAGCCAC | SLC50A1       | 130 | 849  | 5 | 2.3 |
| GTGCTGACATCTAACCCGTCTAGA | HAND1         | 62  | 402  | 5 | 2.3 |
| TCGTTAGTTGTCAAATGCCAAACC | STK32C        | 5   | 32   | 5 | 2.3 |
| TGTCCCATCACCATGAGTGCCGT  | VMAC          | 146 | 933  | 5 | 2.3 |
| ATGCTGGGAAGCGATAATCGCGTA | BCCIP         | 44  | 277  | 5 | 2.3 |
| CAATCGACGCTAAAGTGACCAGGA | RPL14         | 158 | 982  | 5 | 2.3 |
| TGGCGCATCCTAAAGTGTAAGATT | HSBP1         | 126 | 779  | 5 | 2.3 |
| ATACCCTGTCGGTTGGTCAATCAC | ULK4          | 8   | 49   | 5 | 2.3 |
| CACCTCATGGGGCGTAAGCCCAGG | CA6           | 168 | 1028 | 5 | 2.2 |
| AATGCGTTCGTGACACTTACGCCT | PSMC4         | 5   | 30   | 5 | 2.2 |
| CTTTCAGGTTGCACAGCGGACTTC | PRAMEF10      | 50  | 297  | 5 | 2.2 |
| GTGCCACCTTTAGACGTAATGGC  | PPP1R1A       | 274 | 1610 | 5 | 2.2 |
| TTCATTACCATAACTCGGTGGCCA | CCDC114       | 48  | 279  | 5 | 2.2 |
| TGCTTCTGCCCCCGTATTAGTAG  | HSPB6         | 130 | 746  | 4 | 2.2 |
| CCGTATATTTCTATTTATTTATCG | TGS1          | 25  | 141  | 4 | 2.1 |
| GATTATACTTTCACGTGGACACGA | IGHD          | 60  | 337  | 4 | 2.1 |
| CTGACGTGCCCTAATTCCTGTGC  | NDUFA10       | 75  | 421  | 4 | 2.1 |
| GGACACTACTCCGTAAAGGTACGT | MPZL1         | 51  | 285  | 4 | 2.1 |
| TGACAGTGGCCAGGCGACCCGCCG | LOC339535     | 17  | 95   | 4 | 2.1 |
| GTGCACCCAGGGCCGTGACTGGAG | TMEM25        | 119 | 660  | 4 | 2.1 |
| GTTCCAGTTGCCGCGCCGGGGTGC | NAALADL2      | 101 | 556  | 4 | 2.1 |
| CCTCTGTCACAGGTACTCTCTGTT | CTC1          | 43  | 235  | 4 | 2.1 |
| ATGGGTTCTGTAGGGCCGCCGCAA | ZDHHC15       | 158 | 859  | 4 | 2.1 |
| ATAACCATTGAGGGTAATTTTAC  | C7ORF49       | 83  | 450  | 4 | 2.1 |

|                           |          |     |     |   |     |
|---------------------------|----------|-----|-----|---|-----|
| ACCCGAATAACATGTAATCTCCCT  | EIF5A    | 68  | 364 | 4 | 2.1 |
| ATAATCAGGGTGTGCCGATCCTGC  | PPYR1    | 76  | 402 | 4 | 2.0 |
| TCTTGAACCTCGAGATTATGACTC  | SLC25A44 | 57  | 299 | 4 | 2.0 |
| ACTATAGCACACTGAAGGTTTGAA  | LIMK2    | 21  | 110 | 4 | 2.0 |
| TATTTAGCACGCAAGAGCCGGAAC  | GABRA5   | 13  | 68  | 4 | 2.0 |
| CAAGTCCCCTACGTGAGCGCCAA   | OR2T2    | 16  | 83  | 4 | 2.0 |
| ACACATTGTTACCGCCACGTTGAG  | RPL15    | 83  | 429 | 4 | 2.0 |
| GTGGCGCCAAGTCGCAATGGACTC  | DNAJC7   | 12  | 62  | 4 | 2.0 |
| CGCACATCAAGTCCCCAGTTCGTG  | SYNGR1   | 141 | 714 | 4 | 2.0 |
| GTCTCCTATTACTACCTCCCTCC   | TNFSF18  | 96  | 484 | 4 | 2.0 |
| AGGTTTAAGGCTCCGCATCTAATC  | CHCHD2   | 3   | 15  | 4 | 2.0 |
| GGGGGATCTACGATATGACAGGCG  | SLC25A22 | 62  | 307 | 4 | 1.9 |
| CCCCAATCGTGCTCCTTCACCTG   | HN1L     | 52  | 257 | 4 | 1.9 |
| TCTCAGCTTTCATATGACGGCCAC  | DAP3     | 34  | 167 | 4 | 1.9 |
| AAAAAAGTCGCCATGCCAGAACAA  | SEMA4C   | 29  | 142 | 4 | 1.9 |
| TTAAGGGTAACATGGCTACGCACT  | UTP23    | 185 | 893 | 4 | 1.9 |
| GCAGGCCTTACTGTACTCCTCAAG  | ALG2     | 137 | 659 | 4 | 1.9 |
| CATCTACGCACTTAACAACACTCT  | DDX19A   | 101 | 483 | 4 | 1.9 |
| ATCCGACAGTATGCGCCCTAGTGA  | ECD      | 18  | 86  | 4 | 1.9 |
| TTGTTCTAGCATATTTTATTACAA  | 42990    | 32  | 151 | 4 | 1.9 |
| GTCATGATTAGTTTATACGATGT   | CHRM4    | 14  | 66  | 4 | 1.9 |
| GTACTCCTACCTTATTCTCGACCG  | DNAJB1   | 49  | 231 | 4 | 1.9 |
| GTGCGGCTGTAGGATGTCGGGCCA  | TSPAN15  | 9   | 42  | 4 | 1.9 |
| GGTTCACAGTTTTTGAACCAACC   | CHI3L2   | 43  | 200 | 4 | 1.9 |
| AAACTGTACGAACGTCTATCCGGT  | SNAPC2   | 14  | 65  | 4 | 1.9 |
| GGCTCATATTGGCAGGAGAAGAAG  | CBFA2T2  | 130 | 603 | 4 | 1.8 |
| ATATGCAGTGAATTAAGGCGATCA  | SIVA1    | 218 | 998 | 4 | 1.8 |
| TTCTAAATACAGTTACCTAACCA   | CATSPER4 | 35  | 160 | 4 | 1.8 |
| GGACACGGGCGTGCCCGATTCACG  | CCDC65   | 16  | 73  | 4 | 1.8 |
| TCCTCGGTTTCTGACTGATCCCC   | GPR20    | 60  | 273 | 4 | 1.8 |
| CTTTCCGCGGGCGGTGGCGCCGTTG | GPER     | 5   | 22  | 3 | 1.8 |
| CTGAAATGTTCCCGTACGGGTACG  | CER1     | 199 | 875 | 3 | 1.8 |
| CGATACCATTACCGACTTTCAATC  | WISP2    | 58  | 254 | 3 | 1.8 |
| TTCCAATAACGCTAAGACGACGGG  | PARVG    | 55  | 240 | 3 | 1.8 |
| GACCTACGAGGTCAGACATACTCG  | RPS2     | 27  | 117 | 3 | 1.8 |
| AGGACAGAGCCAACGAAAACGGAT  | AIPL1    | 42  | 181 | 3 | 1.7 |
| AGTATCTCTCAGCGAAATAGTGAC  | ZCRB1    | 25  | 107 | 3 | 1.7 |
| TACACGATACCCCGTGCTGAGACC  | C1ORF87  | 44  | 187 | 3 | 1.7 |
| TGGCCGTGCGGGCTCAATTGTCCA  | RAB28    | 59  | 250 | 3 | 1.7 |
| CCAACCCCTACGACAGTCGAGTGC  | SUCNR1   | 225 | 946 | 3 | 1.7 |
| AGAGGTTTGCTATCCCGTCCCTCCG | EBAG9    | 114 | 475 | 3 | 1.7 |
| ACGTTGCATCCAAGCTTTGAGAG   | CCDC146  | 72  | 298 | 3 | 1.7 |
| TCATGTTACCATGCAAAAGTGATG  | NUDT3    | 134 | 550 | 3 | 1.7 |
| GCTCGCCCGCTCGGCTTAGGCTCA  | WHAMMP3  | 29  | 119 | 3 | 1.7 |

|                           |           |      |      |   |     |
|---------------------------|-----------|------|------|---|-----|
| TGACTTCAAATGTACGGAAGGTAA  | C10ORF125 | 143  | 583  | 3 | 1.7 |
| TGGCCACCCGCCCTTACGGCATA   | C7ORF34   | 500  | 2029 | 3 | 1.7 |
| TGGTCAGTCATACAACAGGCAGAC  | EXOC2     | 2    | 8    | 3 | 1.6 |
| CCCATCTACTAGCATTGGGAGGTT  | C12ORF4   | 1    | 4    | 3 | 1.6 |
| CGTGCCTCGTCCCGATTTAGCTAT  | GPR82     | 1    | 4    | 3 | 1.6 |
| GCCCTCTAAAAATCTACTTCAGCC  | TSPYL1    | 13   | 51   | 3 | 1.6 |
| ATCACATGGAGAGCAATGTTGACC  | CYCS      | 574  | 2244 | 3 | 1.6 |
| ACCCCATCCAACCTCCGGATCTA   | MFF       | 11   | 43   | 3 | 1.6 |
| CTAAGGACACAGGCTCCACGAAAT  | CPA3      | 111  | 432  | 3 | 1.6 |
| CTCTGAGACGCTGCAATCGACGAT  | TMEM35    | 224  | 869  | 3 | 1.6 |
| ACCTAGTCTGGCCTCACGTTAAGG  | TMOD3     | 156  | 605  | 3 | 1.6 |
| GCACGGCCCGTAGCCCTATCGCCC  | FAM27L    | 71   | 272  | 3 | 1.6 |
| TCTCAATACCCAATGCCCTTTTTG  | ATG10     | 181  | 684  | 3 | 1.6 |
| GCACAGTCTCAGAGTGCCACAACC  | TAS2R3    | 331  | 1247 | 3 | 1.5 |
| TGTGGTTCTCGGCCTTCACAGGTC  | RPL14     | 240  | 899  | 3 | 1.5 |
| CCAAGGACAAAGTCTAGAGAGCCT  | EIF4E2    | 69   | 256  | 3 | 1.5 |
| TATTACCGGGCCGTATTAGTTGAA  | TEX2      | 31   | 115  | 3 | 1.5 |
| CTTAAAACAACCCATCCTCCGGTG  | PRAF2     | 102  | 375  | 3 | 1.5 |
| GTGACGGTAGCCACATGTTCTCTGC | RPL19     | 151  | 554  | 3 | 1.5 |
| AGCTTAGCACTATAGGTAGCTATC  | OSTM1     | 3    | 11   | 3 | 1.5 |
| GCGGAGATACGACCCTACCACACC  | COX4I2    | 232  | 846  | 3 | 1.5 |
| CGCGGTAAGCACCTCATGCGCCGC  | CEPT1     | 70   | 254  | 3 | 1.5 |
| ACATCAGTACCCCCGCAGATCGTC  | DMWD      | 128  | 463  | 3 | 1.5 |
| TTCGCTAATCATTAAAAAACGGA   | NAGS      | 29   | 104  | 3 | 1.5 |
| CGGACTTCGCGTGCGTAGGTCTTC  | FGR       | 7    | 25   | 3 | 1.5 |
| GCAATAACTGAACTTGTACAATAA  | TYRP1     | 42   | 149  | 3 | 1.5 |
| GCCGCTTTTGGATGTACCGAGTTG  | C17ORF53  | 58   | 205  | 3 | 1.5 |
| TGCCGCCATCCGATTAAGTCCCAT  | TRIM13    | 31   | 109  | 3 | 1.4 |
| TCGTAACGCCAGGTATCTCGGGTA  | PCK1      | 4    | 14   | 3 | 1.4 |
| CGAACTACTTACCTAATCGTGGGA  | MST1R     | 141  | 493  | 3 | 1.4 |
| CTTGTTTCGTGTTAGGATCGTT    | CCDC42    | 70   | 244  | 3 | 1.4 |
| TAAAGTCTGCATATGCCAAGCTGG  | SNAP47    | 188  | 645  | 3 | 1.4 |
| TTTTTAGACCATACGTGGGATTTT  | GSTA1     | 14   | 48   | 3 | 1.4 |
| CAACCTGAGAGTGTTGACCGAAGA  | C14ORF79  | 319  | 1074 | 3 | 1.4 |
| TGATAGCCGAGTGACCACCTTTTT  | NRIP3     | 196  | 656  | 3 | 1.4 |
| TAACCAACTCCCCTGTGCTCTGGG  | SEC61B    | 86   | 287  | 3 | 1.4 |
| GGCTTATTAGGACTCATCGCGCCC  | TXLNA     | 3    | 10   | 3 | 1.4 |
| TTTCTTGGCTTGCACTGTGACCGC  | NUDT14    | 99   | 330  | 3 | 1.4 |
| CCCAGTGGGGTCCGGGTCAACTCG  | TMEM206   | 16   | 53   | 3 | 1.4 |
| ATCATTCGCACAACCACGAACTCA  | CCL4      | 1293 | 4240 | 3 | 1.3 |
| AAAACCGGAACATGTACCTCGCAC  | DGUOK     | 31   | 101  | 3 | 1.3 |
| TGCCTTGCCGTAGTCAAACCTCACC | ZNF416    | 8    | 26   | 3 | 1.3 |
| AACGCCAAACCATATGCACCGTCC  | C3AR1     | 56   | 182  | 3 | 1.3 |
| AAGTCTATCAAAGTCCCATCACT   | ACPP      | 30   | 97   | 3 | 1.3 |
| GCTGACCAGAACTCTGACTATTT   | LACRT     | 220  | 708  | 2 | 1.3 |

|                           |              |     |      |   |     |
|---------------------------|--------------|-----|------|---|-----|
| ATCACAGGCGGCGTAGCCGACCCG  | BMS1P5       | 253 | 813  | 2 | 1.3 |
| GATGCGGTGTGACGGATGTTCCCA  | GOLGA7       | 183 | 587  | 2 | 1.3 |
| GATTTGCACCTTAGACAGGGGGTC  | TOLLIP       | 118 | 376  | 2 | 1.3 |
| ACAGGTGTTTTGGCCGACTACTAA  | C15ORF53     | 102 | 325  | 2 | 1.3 |
| ATCCAAATGCGCGCCAGTTGCCTA  | MRPS11       | 170 | 530  | 2 | 1.3 |
| TCAGGGACACTTACAAGCCGGCGT  | LINC00518    | 103 | 321  | 2 | 1.3 |
| ATCAGACACGCCTATCCTACGAGG  | SPATA8       | 161 | 501  | 2 | 1.3 |
| GCTGCTAGCTATCAAGTAAAATT   | C22ORF31     | 53  | 162  | 2 | 1.2 |
| CCGGCGTACCTCTACCTAACATT   | MRPL43       | 126 | 383  | 2 | 1.2 |
| AAATCCTAGTAACGCCCAATATA   | RIMKLA       | 56  | 168  | 2 | 1.2 |
| TCTCAATATACGGCGGTAAGTGCG  | NANOG        | 1   | 3    | 2 | 1.2 |
| CTTGACGTCAGTAGATCATTTTC   | WDR18        | 1   | 3    | 2 | 1.2 |
| TGTCTCGTCCATTAAAGGTGTCG   | TREML2       | 1   | 3    | 2 | 1.2 |
| CCTGGACACAATCTCTGCAAATTA  | JPH1         | 25  | 74   | 2 | 1.2 |
| TGCAGCTTTACAACATGCACTCTG  | PDE6D        | 136 | 401  | 2 | 1.2 |
| TTCGACGTAGATCTATGGGCGTGC  | ANKRD49      | 70  | 206  | 2 | 1.2 |
| CGTGTGAAGCGCTGCGCAGTTTG   | NPR3         | 82  | 240  | 2 | 1.2 |
| GAAAACAGTATACCGCTGCCGACG  | TRIB2        | 24  | 70   | 2 | 1.2 |
| GTGTCATGCCCCCGTTTACCGTT   | PPIE         | 24  | 70   | 2 | 1.2 |
| AAATTACCTACGATATTCCTATGA  | GPR162       | 71  | 207  | 2 | 1.2 |
| CTTGACCCATCCGACATATTACTC  | MB21D1       | 101 | 294  | 2 | 1.2 |
| CAGAGTACTCCGAGACTACAGGTC  | C2ORF73      | 138 | 399  | 2 | 1.2 |
| GTTGGCCATCACCTACGCAATTAC  | CCDC28B      | 226 | 638  | 2 | 1.1 |
| TCGATGTTAACGCCTCGAGCACTT  | SLC25A10     | 106 | 299  | 2 | 1.1 |
| GGACCCGAACGTCACTGCTATAACC | DAD1         | 9   | 25   | 2 | 1.1 |
| GAGACGCCGTACGACATTTTTAAA  | PPIL1        | 28  | 76   | 2 | 1.1 |
| GGCGAACTGTGAGTTTGTTCACC   | IL28A        | 258 | 684  | 2 | 1.0 |
| TAGCGCTCCGCATCATCGACTTGC  | TXNDC11      | 74  | 195  | 2 | 1.0 |
| AAATTTGTATGCCACCGTCGCCTA  | <b>FGF6</b>  | 352 | 921  | 2 | 1.0 |
| TACTAAATTCCTGAAACCATTAC   | <b>IL17A</b> | 504 | 1309 | 2 | 1.0 |

**S. Table 6: Gene family annotation of overrepresented genes in our genome-wide ORF screen.**

| <b>Gene Family Annotation</b>       | <b>Cytokines and Growth Factors</b> | <b>Transcription Factors</b> | <b>Homeodomain Proteins</b> | <b>Cell Differentiation Markers</b> | <b>Protein Kinases</b> | <b>Translocated Cancer Genes</b> | <b>Oncogenes</b> | <b>Tumor Suppressors</b> |
|-------------------------------------|-------------------------------------|------------------------------|-----------------------------|-------------------------------------|------------------------|----------------------------------|------------------|--------------------------|
| <i>Tumor Suppressors</i>            | 0                                   | 0                            | 0                           | 0                                   | 0                      | 0                                | 0                | 0                        |
| <i>Oncogenes</i>                    | 0                                   | 1                            | 0                           | 0                                   | 0                      | 3                                | 3                |                          |
| <i>Translocated Cancer Genes</i>    | 0                                   | 1                            | 0                           | 0                                   | 0                      | 3                                |                  |                          |
| <i>Protein Kinases</i>              | 0                                   | 0                            | 0                           | 1                                   | 12                     |                                  |                  |                          |
| <i>Cell Differentiation Markers</i> | 1                                   | 0                            | 0                           | 7                                   |                        |                                  |                  |                          |
| <i>Homeodomain Proteins</i>         | 0                                   | 5                            | 5                           |                                     |                        |                                  |                  |                          |
| <i>Transcription Factors</i>        | 0                                   | 20                           |                             |                                     |                        |                                  |                  |                          |
| <i>Cytokines and Growth Factors</i> | 18                                  |                              |                             |                                     |                        |                                  |                  |                          |

**S. Table 7: GSEA of cellular pathways enriched in PD-L1<sup>high</sup> cells.**

| <b>Enriched Gene Set Name</b>          | <b>No. Genes in Gene Set (K)</b> | <b>No. Genes in Overlap (k)</b> | <b>p-Value</b> | <b>FDR q-value</b> |
|----------------------------------------|----------------------------------|---------------------------------|----------------|--------------------|
| GO_RESPONSE_TO_EXTERNAL_STIMULUS       | 1821                             | 43                              | 2.99E-12       | 6.63E-09           |
| GO_CELL_CELL_SIGNALING                 | 767                              | 26                              | 4.44E-11       | 4.93E-08           |
| GO_REGULATION_OF_RESPONSE_TO_STRESS    | 1468                             | 36                              | 7.36E-11       | 5.44E-08           |
| GO_REGULATION_OF_IMMUNE_SYSTEM_PROCESS | 1403                             | 34                              | 3.50E-10       | 1.55E-07           |
| HALLMARK_MYC_TARGETS_V1                | 200                              | 7                               | 5.31E-04       | 1.33E-02           |
| HALLMARK_TNFA_SIGNALING_VIA_NFKB       | 200                              | 7                               | 5.31E-04       | 1.33E-02           |

**S. Table 8: RNA-seq GSEA for IFN $\gamma$ -treated and FGF2-treated UM-SCC-14a cells identified 168 and 121 positively correlated gene sets, respectively, and 1 and 3 negatively correlated genes sets, respectively.**

| Correlation | IFN $\gamma$ Control                    | SI Z E | ES             | NES            | NO M p-val | FDR q-val     | F W E R p-val |
|-------------|-----------------------------------------|--------|----------------|----------------|------------|---------------|---------------|
| Negative    | KRAS.LUNG UP.V1 DN                      | 140    | -0.74<br>33987 | -1.82<br>23642 | 0          | 0.00<br>51953 | 0.007         |
| Positive    | HALLMARK INTERFERON GAMMA RESPONSE      | 198    | 0.90<br>554595 | 2.22<br>04711  | 0          | 0             | 0             |
| Positive    | HALLMARK INTERFERON ALPHA RESPONSE      | 95     | 0.96<br>12267  | 2.17<br>19477  | 0          | 0             | 0             |
| Positive    | GO_RIBOSOME_BIOGENESIS                  | 264    | 0.84<br>289455 | 2.13<br>7643   | 0          | 0             | 0             |
| Positive    | GO_RIBONUCLEOPROTEIN_COMPLEX_BIOGENESIS | 454    | 0.80<br>612314 | 2.12<br>35926  | 0          | 0             | 0             |
| Positive    | HALLMARK MYC TARGETS V1                 | 197    | 0.85<br>763717 | 2.09<br>8156   | 0          | 0             | 0             |
| Positive    | GO_NCRNA_METABOLIC_PROCESS              | 428    | 0.78<br>94097  | 2.07<br>03828  | 0          | 0             | 0             |
| Positive    | GO_DEFENSE_RESPONSE_TO_VIRUS            | 231    | 0.83<br>0162   | 2.06<br>57225  | 0          | 0             | 0             |

|          |                                                                       |     |                    |                   |   |   |   |
|----------|-----------------------------------------------------------------------|-----|--------------------|-------------------|---|---|---|
| Positive | GO_RRNA_METABOLIC_PROCESS                                             | 194 | 0.83<br>6513<br>6  | 2.05<br>265<br>76 | 0 | 0 | 0 |
| Positive | GO_NCRNA_PROCESSING                                                   | 352 | 0.79<br>4359<br>3  | 2.05<br>205<br>08 | 0 | 0 | 0 |
| Positive | GO_RESPONSE_TO_INTERFERON_GAMMA                                       | 192 | 0.83<br>4740<br>6  | 2.03<br>901<br>62 | 0 | 0 | 0 |
| Positive | GO_INTERFERON_GAMMA_MEDIATED_SIGNALING_PATHWAY                        | 87  | 0.90<br>3871<br>8  | 2.03<br>532<br>77 | 0 | 0 | 0 |
| Positive | GO_RESPONSE_TO_VIRUS                                                  | 314 | 0.79<br>2395<br>2  | 2.03<br>247<br>43 | 0 | 0 | 0 |
| Positive | GO_RESPONSE_TO_TYPE_I_INTERFERON                                      | 95  | 0.88<br>4549<br>56 | 2.00<br>473<br>38 | 0 | 0 | 0 |
| Positive | GO_MITOCHONDRIAL_GENE_EXPRESSION                                      | 151 | 0.82<br>9927<br>4  | 2.00<br>008<br>3  | 0 | 0 | 0 |
| Positive | HALLMARK_ALLOGRAFT_REJECTION                                          | 199 | 0.81<br>8126<br>7  | 1.99<br>895<br>52 | 0 | 0 | 0 |
| Positive | GO_MRNA_TRANSPORT                                                     | 147 | 0.81<br>4650<br>3  | 1.94<br>992<br>22 | 0 | 0 | 0 |
| Positive | GO_MITOCHONDRIAL_TRANSLATION                                          | 129 | 0.83<br>5553       | 1.94<br>423<br>84 | 0 | 0 | 0 |
| Positive | GO_TUMOR_NECROSIS_FACTOR_MEDIATED_SIGNALING_PATHWAY                   | 160 | 0.80<br>0192       | 1.93<br>832<br>87 | 0 | 0 | 0 |
| Positive | GO_NUCLEAR_TRANSCRIBED_MRNA_CATABOLIC_PROCESS_NONSENSE_MEDIATED_DECAY | 118 | 0.82<br>8192<br>23 | 1.93<br>481<br>61 | 0 | 0 | 0 |



|          |                                                                                     |     |                    |                   |   |   |   |
|----------|-------------------------------------------------------------------------------------|-----|--------------------|-------------------|---|---|---|
| Positive | GO RNA EXPORT FROM NUCLEUS                                                          | 136 | 0.81<br>8827<br>3  | 1.93<br>221<br>76 | 0 | 0 | 0 |
| Positive | GO T CELL RECEPTOR SIGNALING PATHWAY                                                | 192 | 0.78<br>9199<br>05 | 1.92<br>800<br>34 | 0 | 0 | 0 |
| Positive | GO RIBONUCLEOPROTEIN COMPLEX SUBUNIT ORGANIZATION                                   | 268 | 0.76<br>4887<br>15 | 1.92<br>775<br>63 | 0 | 0 | 0 |
| Positive | GO VIRAL GENE EXPRESSION                                                            | 189 | 0.79<br>5527<br>04 | 1.92<br>708<br>65 | 0 | 0 | 0 |
| Positive | GO ANTIGEN PROCESSING AND PRESENTATION                                              | 219 | 0.77<br>4137<br>5  | 1.92<br>093<br>96 | 0 | 0 | 0 |
| Positive | GO ANTIGEN PROCESSING AND PRESENTATION OF PEPTIDE ANTIGEN                           | 184 | 0.79<br>3903<br>95 | 1.91<br>890<br>66 | 0 | 0 | 0 |
| Positive | GO RNA LOCALIZATION                                                                 | 225 | 0.77<br>0636<br>4  | 1.91<br>484<br>64 | 0 | 0 | 0 |
| Positive | GO TRANSLATIONAL TERMINATION                                                        | 102 | 0.84<br>0555<br>3  | 1.91<br>340<br>37 | 0 | 0 | 0 |
| Positive | GO ESTABLISHMENT OF RNA LOCALIZATION                                                | 192 | 0.78<br>4134<br>7  | 1.90<br>935<br>22 | 0 | 0 | 0 |
| Positive | GO RIBOSOMAL SMALL SUBUNIT BIOGENESIS                                               | 60  | 0.88<br>3119<br>17 | 1.90<br>088<br>84 | 0 | 0 | 0 |
| Positive | GO_ANTIGEN_PROCESSING_AND_PRESENTATION_OF_EXOGENOUS_PEPTIDE_ANTIGEN_VIA_MHC_CLASS_I | 79  | 0.86<br>0363<br>5  | 1.88<br>969<br>02 | 0 | 0 | 0 |
| Positive | GO RNA SPLICING VIA TRANSESTERIFICATION REACTIONS                                   | 364 | 0.73<br>3712<br>43 | 1.88<br>796<br>64 | 0 | 0 | 0 |

|          |                                                                           |     |                |               |   |              |           |
|----------|---------------------------------------------------------------------------|-----|----------------|---------------|---|--------------|-----------|
| Positive | HALLMARK E2F TARGETS                                                      | 197 | 0.77<br>368    | 1.88<br>32386 | 0 | 3.86<br>E-05 | 0.0<br>01 |
| Positive | GO ANAPHASE PROMOTING COMPLEX DEPENDENT CATABOLIC PROCESS                 | 81  | 0.84<br>312487 | 1.88<br>0065  | 0 | 3.74<br>E-05 | 0.0<br>01 |
| Positive | CSR EARLY UP.V1 UP                                                        | 144 | 0.78<br>377974 | 1.87<br>97913 | 0 | 3.63<br>E-05 | 0.0<br>01 |
| Positive | GO MRNA EXPORT FROM NUCLEUS                                               | 110 | 0.80<br>72395  | 1.87<br>20449 | 0 | 3.53<br>E-05 | 0.0<br>01 |
| Positive | GO_ESTABLISHMENT_OF_PROTEIN_LOCALIZATION_TO_ENDOPLASMIC_RETICULUM         | 115 | 0.80<br>19684  | 1.86<br>90088 | 0 | 3.43<br>E-05 | 0.0<br>01 |
| Positive | GO POSITIVE REGULATION OF ADAPTIVE IMMUNE RESPONSE                        | 100 | 0.81<br>91012  | 1.86<br>8452  | 0 | 3.34<br>E-05 | 0.0<br>01 |
| Positive | HALLMARK MYC TARGETS V2                                                   | 58  | 0.88<br>16229  | 1.86<br>77616 | 0 | 3.25<br>E-05 | 0.0<br>01 |
| Positive | GO REGULATION OF ADAPTIVE IMMUNE RESPONSE                                 | 156 | 0.77<br>79789  | 1.86<br>36589 | 0 | 3.17<br>E-05 | 0.0<br>01 |
| Positive | GO_ANTIGEN_PROCESSING_AND_PRESENTATION_OF_PEPTIDE_ANTIGEN_VIA_MHC_CLASS_I | 95  | 0.82<br>904613 | 1.86<br>15639 | 0 | 3.09<br>E-05 | 0.0<br>01 |
| Positive | GO REGULATION OF T CELL MEDIATED IMMUNITY                                 | 67  | 0.85<br>51836  | 1.86<br>03039 | 0 | 3.01<br>E-05 | 0.0<br>01 |
| Positive | GO NUCLEAR EXPORT                                                         | 194 | 0.75<br>093067 | 1.85<br>66462 | 0 | 2.94<br>E-05 | 0.0<br>01 |
| Positive | GO ANTIGEN RECEPTOR MEDIATED SIGNALING PATHWAY                            | 290 | 0.73<br>200166 | 1.85<br>12741 | 0 | 2.87<br>E-05 | 0.0<br>01 |

|          |                                                            |     |                    |                   |   |              |           |
|----------|------------------------------------------------------------|-----|--------------------|-------------------|---|--------------|-----------|
| Positive | GO MITOCHONDRIAL TRANSLATIONAL TERMINATION                 | 87  | 0.83<br>5857<br>15 | 1.85<br>109<br>3  | 0 | 2.81<br>E-05 | 0.0<br>01 |
| Positive | GO RNA CATABOLIC PROCESS                                   | 380 | 0.71<br>3868<br>4  | 1.84<br>896<br>83 | 0 | 2.74<br>E-05 | 0.0<br>01 |
| Positive | GO TRNA METABOLIC PROCESS                                  | 172 | 0.76<br>3368<br>25 | 1.84<br>852<br>99 | 0 | 2.68<br>E-05 | 0.0<br>01 |
| Positive | GO COTRANSLATIONAL PROTEIN TARGETING TO MEMBRANE           | 102 | 0.81<br>116        | 1.84<br>194<br>33 | 0 | 2.63<br>E-05 | 0.0<br>01 |
| Positive | GO DNA TEMPLATED TRANSCRIPTION TERMINATION                 | 71  | 0.84<br>1748<br>6  | 1.83<br>701<br>37 | 0 | 2.57<br>E-05 | 0.0<br>01 |
| Positive | GO NEGATIVE REGULATION OF CELL CYCLE G2 M PHASE TRANSITION | 98  | 0.80<br>8598<br>94 | 1.83<br>624<br>3  | 0 | 2.52<br>E-05 | 0.0<br>01 |
| Positive | GO POSITIVE REGULATION OF LYMPHOCYTE MEDIATED IMMUNITY     | 101 | 0.79<br>8844<br>04 | 1.83<br>110<br>89 | 0 | 4.95<br>E-05 | 0.0<br>02 |
| Positive | GO REGULATION OF INNATE IMMUNE RESPONSE                    | 426 | 0.69<br>5950<br>15 | 1.83<br>027<br>64 | 0 | 4.85<br>E-05 | 0.0<br>02 |
| Positive | LTE2 UP.V1 DN                                              | 188 | 0.74<br>3739<br>07 | 1.82<br>792<br>9  | 0 | 1.19<br>E-04 | 0.0<br>05 |
| Positive | GO RIBOSOMAL LARGE SUBUNIT BIOGENESIS                      | 66  | 0.86<br>7644<br>9  | 1.82<br>506<br>57 | 0 | 1.17<br>E-04 | 0.0<br>05 |
| Positive | GO NEGATIVE REGULATION OF VIRAL PROCESS                    | 93  | 0.80<br>3950<br>6  | 1.82<br>447<br>61 | 0 | 1.15<br>E-04 | 0.0<br>05 |
| Positive | GO PROTEIN LOCALIZATION TO ENDOPLASMIC RETICULUM           | 139 | 0.76<br>2666       | 1.82<br>419<br>19 | 0 | 1.13<br>E-04 | 0.0<br>05 |

|          |                                                                                                                              |     |            |           |   |          |       |
|----------|------------------------------------------------------------------------------------------------------------------------------|-----|------------|-----------|---|----------|-------|
| Positive | GO_ADAPTIVE_IMMUNE_RESPONSE_BASED_ON_SOMATIC_RECOMBINATION_OF_IMMUNE_RECEPTORS_BUILT_FROM_IMMUNOGLOBULIN_SUPERFAMILY_DOMAINS | 338 | 0.70853966 | 1.8201495 | 0 | 1.54E-04 | 0.007 |
| Positive | GO_REGULATION_OF_SYMBIOSIS_ENCOMPASSING_MUTUALISM_THROUGH_PARASITISM                                                         | 219 | 0.72928363 | 1.8119262 | 0 | 2.16E-04 | 0.01  |
| Positive | GO_RNA_3_END_PROCESSING                                                                                                      | 136 | 0.7802188  | 1.8105692 | 0 | 2.33E-04 | 0.011 |
| Positive | GO_REGULATION_OF_T_CELL_MEDIATED_CYTOTOXICITY                                                                                | 32  | 0.92628205 | 1.798591  | 0 | 2.91E-04 | 0.014 |
| Positive | GO_RNA_SPLICING                                                                                                              | 447 | 0.6888717  | 1.796681  | 0 | 3.06E-04 | 0.015 |
| Positive | GO_POSITIVE_REGULATION_OF_T_CELL_MEDIATED_IMMUNITY                                                                           | 45  | 0.8829626  | 1.7949487 | 0 | 3.21E-04 | 0.016 |
| Positive | GO_REGULATION_OF_RESPONSE_TO_CYTOKINE_STIMULUS                                                                               | 168 | 0.73940355 | 1.792726  | 0 | 3.16E-04 | 0.016 |
| Positive | GO_REGULATION_OF_VIRAL_LIFE_CYCLE                                                                                            | 137 | 0.7612554  | 1.792642  | 0 | 3.11E-04 | 0.016 |
| Positive | GO_REGULATION_OF_TRANSCRIPTION_FROM_RNA_POLYMERASE_II_PROMOTER_IN_RESPONSE_TO_HYPOXIA                                        | 74  | 0.8175832  | 1.79003   | 0 | 3.64E-04 | 0.019 |
| Positive | GO_REGULATION_OF_LYMPHOCYTE_MEDIATED_IMMUNITY                                                                                | 146 | 0.7462191  | 1.7890184 | 0 | 3.58E-04 | 0.019 |
| Positive | GO_DNA_REPLICATION                                                                                                           | 261 | 0.71207047 | 1.7888429 | 0 | 3.71E-04 | 0.02  |
| Positive | GO_DNA_DEPENDENT_DNA_REPLICATION                                                                                             | 139 | 0.75642145 | 1.7864088 | 0 | 4.20E-04 | 0.023 |

|          |                                                       |     |                    |                   |   |              |           |
|----------|-------------------------------------------------------|-----|--------------------|-------------------|---|--------------|-----------|
| Positive | GO MATURATION OF SSU RRNA                             | 42  | 0.88<br>6319<br>76 | 1.78<br>626<br>48 | 0 | 4.14<br>E-04 | 0.0<br>23 |
| Positive | GO TRANSLATIONAL INITIATION                           | 190 | 0.72<br>7144<br>2  | 1.78<br>516<br>84 | 0 | 4.08<br>E-04 | 0.0<br>23 |
| Positive | GO POSITIVE REGULATION OF IMMUNE EFFECTOR PROCESS     | 209 | 0.71<br>6914<br>53 | 1.77<br>745<br>22 | 0 | 4.56<br>E-04 | 0.0<br>26 |
| Positive | GO RIBOSOME ASSEMBLY                                  | 56  | 0.84<br>8006<br>84 | 1.77<br>373<br>72 | 0 | 4.66<br>E-04 | 0.0<br>27 |
| Positive | GO VIRAL LIFE CYCLE                                   | 311 | 0.68<br>6978<br>43 | 1.76<br>797<br>43 | 0 | 6.64<br>E-04 | 0.0<br>39 |
| Positive | GO REGULATION OF IMMUNE EFFECTOR PROCESS              | 443 | 0.67<br>7474<br>8  | 1.76<br>731<br>98 | 0 | 6.55<br>E-04 | 0.0<br>39 |
| Positive | GO SPLICEOSOMAL COMPLEX ASSEMBLY                      | 75  | 0.81<br>4205<br>4  | 1.76<br>642<br>14 | 0 | 6.46<br>E-04 | 0.0<br>39 |
| Positive | GO LYMPHOCYTE MEDIATED IMMUNITY                       | 331 | 0.68<br>8444<br>3  | 1.76<br>478<br>89 | 0 | 6.54<br>E-04 | 0.0<br>4  |
| Positive | GO POSITIVE REGULATION OF LEUKOCYTE MEDIATED IMMUNITY | 128 | 0.75<br>2419<br>95 | 1.76<br>390<br>73 | 0 | 6.78<br>E-04 | 0.0<br>42 |
| Positive | GO TRNA PROCESSING                                    | 125 | 0.75<br>8159<br>6  | 1.76<br>381<br>46 | 0 | 6.69<br>E-04 | 0.0<br>42 |
| Positive | GO TYPE I INTERFERON PRODUCTION                       | 122 | 0.75<br>8166<br>6  | 1.76<br>089<br>29 | 0 | 8.02<br>E-04 | 0.0<br>49 |
| Positive | GO VIRAL GENOME REPLICATION                           | 114 | 0.76<br>8361<br>8  | 1.76<br>064<br>32 | 0 | 8.07<br>E-04 | 0.0<br>5  |

|          |                                                                                              |     |                    |                   |   |                    |           |
|----------|----------------------------------------------------------------------------------------------|-----|--------------------|-------------------|---|--------------------|-----------|
| Positive | GO REGULATION OF CELL KILLING                                                                | 90  | 0.78<br>2682<br>96 | 1.75<br>850<br>76 | 0 | 8.74<br>E-04       | 0.0<br>55 |
| Positive | GO TRANSLATIONAL ELONGATION                                                                  | 129 | 0.74<br>3247<br>75 | 1.75<br>704<br>41 | 0 | 8.94<br>E-04       | 0.0<br>57 |
| Positive | GO NEGATIVE REGULATION OF VIRAL GENOME REPLICATION                                           | 55  | 0.83<br>7774<br>34 | 1.75<br>478<br>66 | 0 | 9.58<br>E-04       | 0.0<br>62 |
| Positive | GO MRNA 3 END PROCESSING                                                                     | 96  | 0.77<br>5591<br>73 | 1.75<br>326<br>97 | 0 | 0.00<br>1005<br>8  | 0.0<br>66 |
| Positive | GO RESPONSE TO TUMOR NECROSIS FACTOR                                                         | 299 | 0.68<br>5340<br>4  | 1.75<br>228<br>9  | 0 | 0.00<br>1066<br>67 | 0.0<br>71 |
| Positive | GO NEGATIVE REGULATION OF INNATE IMMUNE RESPONSE                                             | 52  | 0.83<br>3471<br>7  | 1.75<br>180<br>8  | 0 | 0.00<br>1097<br>57 | 0.0<br>74 |
| Positive | GO_ANTIGEN_PROCESSING_AND_PRESENTATION_OF_PEPTIDE_OR_POLYSACCHARIDE ANTIGEN VIA MHC CLASS II | 98  | 0.76<br>5876<br>7  | 1.75<br>085<br>64 | 0 | 0.00<br>1141<br>94 | 0.0<br>78 |
| Positive | HALLMARK INFLAMMATORY RESPONSE                                                               | 197 | 0.71<br>4351<br>13 | 1.75<br>075<br>13 | 0 | 0.00<br>1128<br>82 | 0.0<br>78 |
| Positive | GO HEMATOPOIETIC STEM CELL DIFFERENTIATION                                                   | 78  | 0.80<br>0417<br>54 | 1.74<br>930<br>2  | 0 | 0.00<br>1213<br>15 | 0.0<br>84 |
| Positive | GO_MATURATION_OF_SSU_RRNA_FROM_TRICISTRONIC_RRNA_TRANSCRIPT_S<br>SU RRNA 5 8S RRNA LSU RRNA  | 32  | 0.91<br>1187<br>6  | 1.74<br>560<br>3  | 0 | 0.00<br>1391<br>61 | 0.0<br>97 |
| Positive | GO POSITIVE REGULATION OF CELL KILLING                                                       | 65  | 0.80<br>1268<br>64 | 1.74<br>502<br>65 | 0 | 0.00<br>1402<br>81 | 0.0<br>99 |
| Positive | GO PROTEIN MODIFICATION BY SMALL PROTEIN REMOVAL                                             | 284 | 0.69<br>0595<br>45 | 1.74<br>496       | 0 | 0.00<br>1387<br>39 | 0.0<br>99 |

|          |                                                                            |     |                    |                   |   |                    |           |
|----------|----------------------------------------------------------------------------|-----|--------------------|-------------------|---|--------------------|-----------|
| Positive | GO REGULATION OF VIRAL GENOME REPLICATION                                  | 89  | 0.78<br>5084<br>37 | 1.74<br>490<br>85 | 0 | 0.00<br>1372<br>31 | 0.0<br>99 |
| Positive | MYC UP.V1 UP                                                               | 165 | 0.72<br>5618<br>96 | 1.74<br>406       | 0 | 0.00<br>1424<br>2  | 0.1<br>03 |
| Positive | HALLMARK G2M CHECKPOINT                                                    | 192 | 0.71<br>9295<br>26 | 1.74<br>334<br>86 | 0 | 0.00<br>1422<br>35 | 0.1<br>04 |
| Positive | GO T CELL MEDIATED IMMUNITY                                                | 102 | 0.76<br>3264<br>9  | 1.74<br>321<br>84 | 0 | 0.00<br>1407<br>37 | 0.1<br>04 |
| Positive | GO_SCF_DEPENDENT_PROTEASOMAL_UBIQUITIN_DEPENDENT_PROTEIN_CATABOLIC_PROCESS | 88  | 0.78<br>3380<br>4  | 1.74<br>161<br>39 | 0 | 0.00<br>1456<br>68 | 0.1<br>09 |
| Positive | GO DNA PACKAGING                                                           | 202 | 0.70<br>4176<br>8  | 1.73<br>950<br>71 | 0 | 0.00<br>1618<br>84 | 0.1<br>22 |
| Positive | GO SPLICEOSOMAL SNRNP ASSEMBLY                                             | 53  | 0.82<br>9151<br>8  | 1.73<br>728<br>13 | 0 | 0.00<br>1714<br>59 | 0.1<br>31 |
| Positive | GO DNA CONFORMATION CHANGE                                                 | 294 | 0.68<br>1752<br>7  | 1.73<br>727<br>63 | 0 | 0.00<br>1697<br>27 | 0.1<br>31 |
| Positive | GO RNA MODIFICATION                                                        | 152 | 0.71<br>9346<br>64 | 1.73<br>443<br>38 | 0 | 0.00<br>1827<br>16 | 0.1<br>42 |
| Positive | GO NEGATIVE REGULATION OF MULTI ORGANISM PROCESS                           | 170 | 0.71<br>6544<br>6  | 1.73<br>355<br>83 | 0 | 0.00<br>1881<br>23 | 0.1<br>48 |
| Positive | GO NUCLEOBASE CONTAINING COMPOUND TRANSPORT                                | 234 | 0.69<br>6797<br>8  | 1.73<br>209<br>14 | 0 | 0.00<br>1995       | 0.1<br>56 |
| Positive | GO REGULATION OF CELLULAR AMINO ACID METABOLIC PROCESS                     | 61  | 0.81<br>4177<br>2  | 1.73<br>094<br>69 | 0 | 0.00<br>2034<br>78 | 0.1<br>6  |

|          |                                                   |     |                    |                   |   |                    |           |
|----------|---------------------------------------------------|-----|--------------------|-------------------|---|--------------------|-----------|
| Positive | GO NUCLEAR TRANSCRIBED MRNA CATABOLIC PROCESS     | 196 | 0.70<br>3513<br>86 | 1.73<br>017<br>51 | 0 | 0.00<br>2074<br>76 | 0.1<br>64 |
| Positive | GO POSITIVE REGULATION OF DEFENSE RESPONSE        | 491 | 0.65<br>8691<br>2  | 1.72<br>922<br>6  | 0 | 0.00<br>2101<br>76 | 0.1<br>66 |
| Positive | GO PROTEIN DNA COMPLEX SUBUNIT ORGANIZATION       | 276 | 0.68<br>6524<br>9  | 1.72<br>823<br>46 | 0 | 0.00<br>2163<br>04 | 0.1<br>73 |
| Positive | GO POSITIVE REGULATION OF LYMPHOCYTE ACTIVATION   | 314 | 0.68<br>0600<br>05 | 1.72<br>764<br>06 | 0 | 0.00<br>2165<br>85 | 0.1<br>75 |
| Positive | GO REGULATION OF LEUKOCYTE MEDIATED IMMUNITY      | 195 | 0.70<br>7284<br>9  | 1.72<br>584<br>84 | 0 | 0.00<br>2316<br>87 | 0.1<br>86 |
| Positive | GO TELOMERE ORGANIZATION                          | 170 | 0.70<br>9007<br>1  | 1.72<br>441<br>33 | 0 | 0.00<br>2385<br>46 | 0.1<br>93 |
| Positive | GO REGULATION OF MRNA PROCESSING                  | 137 | 0.73<br>5009<br>4  | 1.72<br>302<br>16 | 0 | 0.00<br>2419<br>66 | 0.1<br>97 |
| Positive | GO RNA PHOSPHODIESTER BOND HYDROLYSIS             | 143 | 0.72<br>8580<br>2  | 1.72<br>226<br>64 | 0 | 0.00<br>2453<br>52 | 0.2       |
| Positive | GO REGULATION OF HEMOPOIESIS                      | 463 | 0.65<br>7895<br>9  | 1.72<br>113<br>92 | 0 | 0.00<br>2530<br>52 | 0.2<br>06 |
| Positive | HALLMARK IL6 JAK STAT3 SIGNALING                  | 86  | 0.76<br>4245<br>7  | 1.72<br>059<br>14 | 0 | 0.00<br>2573<br>73 | 0.2<br>12 |
| Positive | GO POSITIVE REGULATION OF LEUKOCYTE PROLIFERATION | 136 | 0.72<br>6863<br>5  | 1.72<br>008<br>31 | 0 | 0.00<br>2615<br>79 | 0.2<br>16 |
| Positive | GO REGULATION OF MULTI ORGANISM PROCESS           | 384 | 0.66<br>6986<br>3  | 1.71<br>995<br>21 | 0 | 0.00<br>2593<br>04 | 0.2<br>16 |



|          |                                                                       |     |                    |                   |   |                    |           |
|----------|-----------------------------------------------------------------------|-----|--------------------|-------------------|---|--------------------|-----------|
| Positive | GO POSITIVE REGULATION OF T CELL MEDIATED CYTOTOXICITY                | 25  | 0.92<br>7294<br>97 | 1.71<br>561<br>3  | 0 | 0.00<br>2918<br>31 | 0.2<br>38 |
| Positive | GO REGULATION OF DNA TEMPLATED TRANSCRIPTION IN RESPONSE TO STRESS    | 119 | 0.73<br>9308<br>8  | 1.71<br>045<br>54 | 0 | 0.00<br>3271<br>85 | 0.2<br>63 |
| Positive | GO DNA BIOSYNTHETIC PROCESS                                           | 181 | 0.70<br>4471       | 1.71<br>026<br>92 | 0 | 0.00<br>3275<br>55 | 0.2<br>66 |
| Positive | GO RESPONSE TO INTERLEUKIN 1                                          | 194 | 0.69<br>8600<br>5  | 1.71<br>016<br>56 | 0 | 0.00<br>3248<br>02 | 0.2<br>66 |
| Positive | GO REGULATION OF LYMPHOCYTE ACTIVATION                                | 459 | 0.64<br>7973<br>95 | 1.70<br>613<br>86 | 0 | 0.00<br>3659<br>59 | 0.2<br>91 |
| Positive | GO REGULATION OF RNA METABOLIC PROCESS                                | 218 | 0.69<br>1221<br>8  | 1.70<br>578<br>11 | 0 | 0.00<br>3659<br>71 | 0.2<br>93 |
| Positive | GO ANTIGEN PROCESSING AND PRESENTATION OF ENDOGENOUS ANTIGEN          | 21  | 0.96<br>4845<br>06 | 1.70<br>480<br>18 | 0 | 0.00<br>3710<br>86 | 0.2<br>99 |
| Positive | GO NCRNA EXPORT FROM NUCLEUS                                          | 38  | 0.83<br>9349<br>45 | 1.70<br>380<br>01 | 0 | 0.00<br>3780<br>93 | 0.3<br>06 |
| Positive | GO IMMUNE RESPONSE REGULATING CELL SURFACE RECEPTOR SIGNALING PATHWAY | 476 | 0.65<br>0767<br>15 | 1.70<br>337<br>58 | 0 | 0.00<br>3790<br>65 | 0.3<br>08 |
| Positive | GO POSITIVE REGULATION OF LEUKOCYTE CELL CELL ADHESION                | 213 | 0.68<br>7558<br>9  | 1.70<br>283<br>87 | 0 | 0.00<br>3789<br>98 | 0.3<br>1  |
| Positive | GO REGULATION OF CELL CYCLE G2 M PHASE TRANSITION                     | 207 | 0.68<br>6800<br>66 | 1.70<br>274<br>63 | 0 | 0.00<br>3779<br>37 | 0.3<br>12 |
| Positive | GO FC EPSILON RECEPTOR SIGNALING PATHWAY                              | 168 | 0.71<br>4431<br>76 | 1.70<br>043<br>03 | 0 | 0.00<br>4019<br>55 | 0.3<br>31 |

|          |                                                                   |     |                    |                   |   |                    |           |
|----------|-------------------------------------------------------------------|-----|--------------------|-------------------|---|--------------------|-----------|
| Positive | GO REGULATION OF LEUKOCYTE PROLIFERATION                          | 215 | 0.69<br>0496<br>74 | 1.69<br>892<br>72 | 0 | 0.00<br>4142<br>62 | 0.3<br>45 |
| Positive | GO POSITIVE REGULATION OF LYMPHOCYTE DIFFERENTIATION              | 92  | 0.75<br>4959<br>46 | 1.69<br>868<br>95 | 0 | 0.00<br>4148<br>45 | 0.3<br>49 |
| Positive | GO REGULATION OF MRNA SPLICING VIA SPLICEOSOME                    | 100 | 0.74<br>1937<br>5  | 1.69<br>854<br>24 | 0 | 0.00<br>4163<br>89 | 0.3<br>51 |
| Positive | GO NIK NF KAPPAB SIGNALING                                        | 171 | 0.70<br>5600<br>6  | 1.69<br>78        | 0 | 0.00<br>4188<br>37 | 0.3<br>55 |
| Positive | GO INTERFERON GAMMA PRODUCTION                                    | 108 | 0.73<br>6608<br>86 | 1.69<br>162<br>89 | 0 | 0.00<br>4845<br>54 | 0.4<br>05 |
| Positive | GO REGULATION OF NUCLEOBASE CONTAINING COMPOUND METABOLIC PROCESS | 489 | 0.63<br>9761<br>6  | 1.69<br>096<br>2  | 0 | 0.00<br>4873<br>48 | 0.4<br>08 |
| Positive | GO REGULATION OF MRNA CATABOLIC PROCESS                           | 193 | 0.69<br>0399<br>35 | 1.69<br>018<br>79 | 0 | 0.00<br>4892<br>08 | 0.4<br>12 |
| Positive | GO NUCLEIC ACID PHOSPHODIESTER BOND HYDROLYSIS                    | 282 | 0.66<br>9253<br>4  | 1.68<br>887<br>59 | 0 | 0.00<br>5065<br>79 | 0.4<br>24 |
| Positive | HALLMARK TNFA SIGNALING VIA NFKB                                  | 198 | 0.69<br>0621       | 1.68<br>881<br>69 | 0 | 0.00<br>5055<br>37 | 0.4<br>26 |
| Positive | GO REGULATION OF T CELL ACTIVATION                                | 305 | 0.66<br>2973<br>34 | 1.68<br>853<br>3  | 0 | 0.00<br>5117<br>57 | 0.4<br>33 |
| Positive | GO INTERACTION WITH SYMBIONT                                      | 79  | 0.76<br>7107<br>5  | 1.68<br>838<br>81 | 0 | 0.00<br>5098<br>44 | 0.4<br>33 |
| Positive | GO REGULATION OF T CELL DIFFERENTIATION                           | 135 | 0.71<br>5425<br>1  | 1.68<br>094<br>04 | 0 | 0.00<br>6209<br>37 | 0.5<br>08 |

|          |                                                         |     |                    |                   |                    |                    |           |
|----------|---------------------------------------------------------|-----|--------------------|-------------------|--------------------|--------------------|-----------|
| Positive | GO REGULATION OF POSTTRANSCRIPTIONAL GENE SILENCING     | 113 | 0.73<br>0291<br>7  | 1.68<br>062<br>39 | 0                  | 0.00<br>6182<br>26 | 0.5<br>09 |
| Positive | GO CHROMATIN ASSEMBLY                                   | 161 | 0.70<br>1844<br>4  | 1.67<br>984<br>58 | 0                  | 0.00<br>6242<br>68 | 0.5<br>16 |
| Positive | GO MRNA SPLICE SITE SELECTION                           | 47  | 0.83<br>1214<br>9  | 1.67<br>874<br>11 | 0.00<br>3891<br>05 | 0.00<br>6423<br>23 | 0.5<br>27 |
| Positive | GO NUCLEAR TRANSPORT                                    | 335 | 0.65<br>7051<br>7  | 1.67<br>675<br>55 | 0                  | 0.00<br>6668<br>8  | 0.5<br>42 |
| Positive | GO POSITIVE REGULATION OF CYTOKINE PRODUCTION           | 438 | 0.64<br>1863<br>47 | 1.67<br>602<br>53 | 0                  | 0.00<br>6775<br>12 | 0.5<br>51 |
| Positive | GO REGULATION OF LEUKOCYTE DIFFERENTIATION              | 267 | 0.66<br>0105<br>7  | 1.67<br>556<br>31 | 0                  | 0.00<br>6796<br>03 | 0.5<br>53 |
| Positive | GO PRODUCTION OF MOLECULAR MEDIATOR OF IMMUNE RESPONSE  | 270 | 0.66<br>5995<br>6  | 1.67<br>389<br>14 | 0                  | 0.00<br>7127<br>44 | 0.5<br>78 |
| Positive | GO POSITIVE REGULATION OF TYPE I INTERFERON PRODUCTION  | 75  | 0.76<br>8583<br>3  | 1.67<br>218<br>86 | 0                  | 0.00<br>7430<br>42 | 0.5<br>96 |
| Positive | GO NUCLEOSOME ORGANIZATION                              | 177 | 0.68<br>7243<br>7  | 1.67<br>075<br>28 | 0                  | 0.00<br>7586<br>89 | 0.6<br>06 |
| Positive | GO POSITIVE REGULATION OF RESPONSE TO CYTOKINE STIMULUS | 54  | 0.79<br>9693<br>8  | 1.67<br>072<br>22 | 0                  | 0.00<br>7535<br>97 | 0.6<br>06 |
| Positive | GO MULTI ORGANISM LOCALIZATION                          | 69  | 0.77<br>2905<br>34 | 1.67<br>046<br>34 | 0                  | 0.00<br>7510<br>14 | 0.6<br>08 |
| Positive | GO T CELL ACTIVATION                                    | 449 | 0.63<br>8425<br>77 | 1.66<br>904<br>21 | 0                  | 0.00<br>7689<br>1  | 0.6<br>15 |

|          |                                                                |     |                    |                   |                    |                    |           |
|----------|----------------------------------------------------------------|-----|--------------------|-------------------|--------------------|--------------------|-----------|
| Positive | GO T CELL MEDIATED CYTOTOXICITY                                | 48  | 0.81<br>3926<br>46 | 1.66<br>842<br>81 | 0                  | 0.00<br>7759<br>93 | 0.6<br>2  |
| Positive | GO REGULATION OF HEMATOPOIETIC PROGENITOR CELL DIFFERENTIATION | 82  | 0.75<br>6990<br>25 | 1.66<br>822<br>72 | 0                  | 0.00<br>7757<br>26 | 0.6<br>22 |
| Positive | GO REGULATION OF GENE SILENCING                                | 148 | 0.70<br>3550<br>2  | 1.66<br>761<br>39 | 0                  | 0.00<br>7793<br>79 | 0.6<br>28 |
| Positive | GO AMINO ACID ACTIVATION                                       | 48  | 0.81<br>6304<br>45 | 1.66<br>738<br>72 | 0                  | 0.00<br>7775<br>43 | 0.6<br>3  |
| Positive | CSR LATE UP.V1 UP                                              | 162 | 0.69<br>0541<br>86 | 1.66<br>568<br>61 | 0                  | 0.00<br>8072<br>86 | 0.6<br>42 |
| Positive | GO POSITIVE REGULATION OF CELL ACTIVATION                      | 370 | 0.64<br>4070<br>15 | 1.66<br>406<br>4  | 0                  | 0.00<br>8411<br>69 | 0.6<br>57 |
| Positive | GO MRNA CIS SPLICING VIA SPLICEOSOME                           | 53  | 0.80<br>1258<br>86 | 1.66<br>370<br>5  | 0.00<br>1869<br>16 | 0.00<br>8428<br>29 | 0.6<br>61 |
| Positive | GO REGULATION OF LYMPHOCYTE DIFFERENTIATION                    | 165 | 0.69<br>0544<br>55 | 1.66<br>309<br>89 | 0                  | 0.00<br>8490<br>65 | 0.6<br>65 |
| Positive | GO NEGATIVE REGULATION OF CELL CYCLE PHASE TRANSITION          | 247 | 0.66<br>2959<br>4  | 1.66<br>275<br>6  | 0                  | 0.00<br>8521<br>35 | 0.6<br>68 |
| Positive | GO DNA TEMPLATED TRANSCRIPTION ELONGATION                      | 105 | 0.71<br>9667<br>6  | 1.66<br>176<br>96 | 0.00<br>3696<br>86 | 0.00<br>8689<br>67 | 0.6<br>75 |
| Positive | GO REGULATION OF DEFENSE RESPONSE TO VIRUS                     | 66  | 0.77<br>6134<br>8  | 1.66<br>133<br>83 | 0.00<br>3490<br>4  | 0.00<br>8757<br>46 | 0.6<br>79 |
| Positive | GO_PROTEASOMAL_UBIQUITIN_INDEPENDENT_PROTEIN_CATABOLIC_PROCES  | 23  | 0.91<br>4779<br>1  | 1.66<br>115<br>09 | 0                  | 0.00<br>8733<br>59 | 0.6<br>81 |

|          |                                                                            |     |                    |                   |   |                    |           |
|----------|----------------------------------------------------------------------------|-----|--------------------|-------------------|---|--------------------|-----------|
| Positive | GO NEGATIVE REGULATION OF CYTOKINE PRODUCTION                              | 265 | 0.66<br>1220<br>85 | 1.66<br>095<br>02 | 0 | 0.00<br>8717<br>34 | 0.6<br>82 |
| Positive | GO REGULATION OF ALPHA BETA T CELL ACTIVATION                              | 91  | 0.74<br>2648<br>36 | 1.66<br>080<br>21 | 0 | 0.00<br>8694<br>2  | 0.6<br>84 |
| Positive | GO REGULATION OF CYTOKINE PRODUCTION INVOLVED IN IMMUNE RESPONSE           | 83  | 0.74<br>0774       | 1.66<br>009<br>1  | 0 | 0.00<br>8819<br>11 | 0.6<br>93 |
| Positive | CAMP UP.V1 UP                                                              | 189 | 0.68<br>6375<br>4  | 1.65<br>874<br>41 | 0 | 0.00<br>8979<br>42 | 0.6<br>99 |
| Positive | GO INTERLEUKIN 1 MEDIATED SIGNALING PATHWAY                                | 100 | 0.73<br>2934<br>65 | 1.65<br>676<br>99 | 0 | 0.00<br>9414<br>97 | 0.7<br>18 |
| Positive | GO TRNA TRANSPORT                                                          | 35  | 0.84<br>0455<br>5  | 1.65<br>370<br>02 | 0 | 0.01<br>0156<br>71 | 0.7<br>43 |
| Positive | GO POSITIVE REGULATION OF NUCLEOBASE CONTAINING COMPOUND METABOLIC PROCESS | 218 | 0.66<br>2531<br>1  | 1.65<br>271<br>59 | 0 | 0.01<br>0255<br>74 | 0.7<br>46 |
| Positive | GO TRANSPORT OF VIRUS                                                      | 57  | 0.76<br>8400<br>55 | 1.65<br>237<br>52 | 0 | 0.01<br>0252<br>89 | 0.7<br>46 |
| Positive | GO POSITIVE REGULATION OF VIRAL PROCESS                                    | 101 | 0.72<br>9543<br>7  | 1.65<br>139<br>41 | 0 | 0.01<br>0450<br>47 | 0.7<br>59 |
| Positive | GO NEGATIVE REGULATION OF LYMPHOCYTE ACTIVATION                            | 139 | 0.69<br>0987<br>7  | 1.64<br>934<br>67 | 0 | 0.01<br>0923<br>88 | 0.7<br>76 |
| Positive | GO POSITIVE REGULATION OF CELL CELL ADHESION                               | 248 | 0.65<br>6674<br>1  | 1.64<br>887<br>87 | 0 | 0.01<br>1002<br>18 | 0.7<br>78 |
| Positive | GO REGULATION OF DEFENSE RESPONSE TO VIRUS BY HOST                         | 35  | 0.83<br>7828<br>4  | 1.64<br>811<br>9  | 0 | 0.01<br>1142<br>77 | 0.7<br>87 |

|          |                                                        |     |                    |                   |                    |                    |           |
|----------|--------------------------------------------------------|-----|--------------------|-------------------|--------------------|--------------------|-----------|
| Positive | GO TYPE 2 IMMUNE RESPONSE                              | 36  | 0.83<br>7968<br>95 | 1.64<br>554<br>13 | 0                  | 0.01<br>1753<br>68 | 0.8<br>09 |
| Positive | GO LEUKOCYTE CELL CELL ADHESION                        | 327 | 0.63<br>8558<br>15 | 1.64<br>491<br>39 | 0                  | 0.01<br>1928<br>95 | 0.8<br>19 |
| Positive | GO NEGATIVE REGULATION OF TYPE I INTERFERON PRODUCTION | 43  | 0.80<br>6645<br>75 | 1.64<br>248<br>22 | 0.00<br>6          | 0.01<br>2496<br>59 | 0.8<br>33 |
| Positive | GO POSITIVE REGULATION OF LEUKOCYTE DIFFERENTIATION    | 142 | 0.69<br>2536<br>06 | 1.64<br>211<br>02 | 0                  | 0.01<br>2550<br>79 | 0.8<br>35 |
| Positive | GO POSITIVE REGULATION OF HEMOPOIESIS                  | 180 | 0.67<br>3020<br>96 | 1.63<br>886<br>25 | 0                  | 0.01<br>3389<br>23 | 0.8<br>52 |
| Positive | GO IMMUNOGLOBULIN PRODUCTION                           | 180 | 0.67<br>6146<br>9  | 1.63<br>866<br>65 | 0                  | 0.01<br>3369<br>4  | 0.8<br>55 |
| Positive | GO MITOTIC SISTER CHROMATID SEGREGATION                | 144 | 0.68<br>8660<br>2  | 1.63<br>824<br>27 | 0                  | 0.01<br>3437<br>55 | 0.8<br>56 |
| Positive | GO MRNA 5 SPLICE SITE RECOGNITION                      | 268 | 0.87<br>8197<br>8  | 1.63<br>785<br>84 | 0.00<br>2012<br>07 | 0.01<br>3510<br>84 | 0.8<br>64 |
| Positive | GO CELL CYCLE G2 M PHASE TRANSITION                    | 260 | 0.64<br>8434<br>8  | 1.63<br>463<br>95 | 0                  | 0.01<br>4545<br>81 | 0.8<br>86 |
| Positive | GO TRNA MODIFICATION                                   | 82  | 0.73<br>5239<br>9  | 1.63<br>444<br>75 | 0.00<br>1838<br>24 | 0.01<br>4526<br>68 | 0.8<br>87 |
| Positive | GO CELL KILLING                                        | 159 | 0.68<br>6707<br>85 | 1.63<br>299<br>18 | 0                  | 0.01<br>5059<br>91 | 0.8<br>96 |
| Positive | GO REGULATION OF CELLULAR AMINE METABOLIC PROCESS      | 79  | 0.74<br>0392<br>3  | 1.63<br>216<br>01 | 0.00<br>1808<br>32 | 0.01<br>5254<br>83 | 0.9<br>03 |

|          |                                                            |     |            |           |            |            |       |
|----------|------------------------------------------------------------|-----|------------|-----------|------------|------------|-------|
| Positive | GO REGULATION OF SIGNAL TRANSDUCTION BY P53 CLASS MEDIATOR | 172 | 0.6675382  | 1.6315975 | 0          | 0.01536961 | 0.904 |
| Positive | GO NON RECOMBINATIONAL REPAIR                              | 85  | 0.73080593 | 1.6315249 | 0          | 0.015308   | 0.904 |
| Positive | GO LEUKOCYTE PROLIFERATION                                 | 286 | 0.6482658  | 1.6311    | 0          | 0.01537532 | 0.905 |
| Positive | GO CYTOKINE PRODUCTION INVOLVED IN IMMUNE RESPONSE         | 99  | 0.7158688  | 1.6303872 | 0          | 0.01552072 | 0.908 |
| Positive | GO B CELL MEDIATED IMMUNITY                                | 200 | 0.6588324  | 1.6299905 | 0          | 0.01558717 | 0.911 |
| Positive | GO POSITIVE REGULATION OF T CELL PROLIFERATION             | 93  | 0.7257773  | 1.6284676 | 0.00178571 | 0.01611701 | 0.902 |
| Positive | GO MYELOID DENDRITIC CELL ACTIVATION                       | 29  | 0.85649455 | 1.627063  | 0.0059761  | 0.01660907 | 0.926 |
| Positive | GO ANTIGEN PROCESSING AND PRESENTATION VIA MHC CLASS IB    | 16  | 0.9650647  | 1.6268317 | 0          | 0.01664342 | 0.927 |
| Positive | GO NEGATIVE REGULATION OF CELL CYCLE PROCESS               | 337 | 0.6358175  | 1.6267465 | 0          | 0.01657115 | 0.928 |
| Positive | GO DOUBLE STRAND BREAK REPAIR                              | 218 | 0.6571105  | 1.6266613 | 0          | 0.01650535 | 0.929 |
| Positive | GO NEGATIVE REGULATION OF LEUKOCYTE DIFFERENTIATION        | 99  | 0.7185225  | 1.6248835 | 0          | 0.0172153  | 0.937 |
| Positive | GO RESPONSE TO INTERFERON BETA                             | 28  | 0.8629353  | 1.6243924 | 0.0019084  | 0.01728285 | 0.939 |

|          |                                                                               |     |                    |                   |                    |                    |           |
|----------|-------------------------------------------------------------------------------|-----|--------------------|-------------------|--------------------|--------------------|-----------|
| Positive | ERBB2 UP.V1_DN                                                                | 184 | 0.66<br>9545<br>23 | 1.62<br>377<br>98 | 0                  | 0.01<br>7429<br>36 | 0.9<br>44 |
| Positive | GO_FC_RECEPTOR_SIGNALING_PATHWAY                                              | 239 | 0.64<br>4838<br>2  | 1.62<br>367<br>6  | 0                  | 0.01<br>7428<br>42 | 0.9<br>45 |
| Positive | GO_MATURATION_OF_5_8S_RRNA                                                    | 26  | 0.87<br>1216<br>36 | 1.62<br>358<br>25 | 0.00<br>9578<br>54 | 0.01<br>7390<br>77 | 0.9<br>46 |
| Positive | GO_POSITIVE_REGULATION_OF_PRODUCTION_OF_MOLECULAR_MEDIATOR_OF_IMMUNE_RESPONSE | 92  | 0.72<br>6531<br>6  | 1.62<br>237<br>69 | 0.00<br>1785<br>71 | 0.01<br>7757<br>22 | 0.9<br>47 |
| Positive | GO_POSITIVE_REGULATION_OF_DEFENSE_RESPONSE_TO_VIRUS_BY_HOST                   | 24  | 0.88<br>4581<br>9  | 1.62<br>206<br>42 | 0.00<br>1915<br>71 | 0.01<br>7766<br>21 | 0.9<br>47 |
| Positive | GO_REGULATION_OF_PRODUCTION_OF_MOLECULAR_MEDIATOR_OF_IMMUNE_RESPONSE          | 136 | 0.68<br>8227<br>8  | 1.62<br>141<br>04 | 0                  | 0.01<br>7847<br>12 | 0.9<br>47 |
| Positive | GO_RIBOSOMAL_LARGE_SUBUNIT_ASSEMBLY                                           | 29  | 0.86<br>5053<br>2  | 1.62<br>129<br>81 | 0                  | 0.01<br>7778<br>19 | 0.9<br>48 |
| Positive | GO_DENDRITIC_CELL_DIFFERENTIATION                                             | 41  | 0.81<br>2086<br>5  | 1.62<br>048<br>35 | 0.00<br>1964<br>64 | 0.01<br>7976<br>43 | 0.9<br>51 |
| Positive | GO_T_CELL_DIFFERENTIATION                                                     | 232 | 0.64<br>7424<br>8  | 1.62<br>043<br>23 | 0                  | 0.01<br>7895<br>89 | 0.9<br>51 |
| Positive | GO_CHROMATIN_ASSEMBLY_OR_DISASSEMBLY                                          | 187 | 0.66<br>0042<br>4  | 1.61<br>937<br>17 | 0                  | 0.01<br>8239<br>04 | 0.9<br>57 |
| Positive | GO_PROTEIN_POLYUBIQUITINATION                                                 | 298 | 0.63<br>4874<br>15 | 1.61<br>901<br>15 | 0                  | 0.01<br>8275<br>27 | 0.9<br>57 |
| Positive | GO_TERMINATION_OF_RNA_POLYMERASE_II_TRANSCRIPTION                             | 34  | 0.83<br>4396<br>96 | 1.61<br>664<br>32 | 0.00<br>3795<br>07 | 0.01<br>9119<br>72 | 0.9<br>69 |



|          |                                                               |     |                    |                   |                    |                    |           |
|----------|---------------------------------------------------------------|-----|--------------------|-------------------|--------------------|--------------------|-----------|
| Positive | GO POSITIVE REGULATION OF B CELL ACTIVATION                   | 126 | 0.69<br>3267<br>7  | 1.61<br>505<br>27 | 0                  | 0.01<br>9693<br>51 | 0.9<br>7  |
| Positive | GO POSTREPLICATION REPAIR                                     | 49  | 0.77<br>5267<br>66 | 1.61<br>397<br>4  | 0.00<br>5424<br>96 | 0.02<br>0062<br>62 | 0.9<br>72 |
| Positive | GO LYMPHOCYTE HOMEOSTASIS                                     | 62  | 0.75<br>5367<br>1  | 1.61<br>317<br>53 | 0.00<br>5338<br>08 | 0.02<br>0250<br>6  | 0.9<br>74 |
| Positive | PTEN DN.V1 DN                                                 | 174 | 0.66<br>0206<br>56 | 1.61<br>198<br>8  | 0                  | 0.02<br>0686<br>01 | 0.9<br>77 |
| Positive | GO REGULATION OF TYPE 2 IMMUNE RESPONSE                       | 30  | 0.86<br>0708<br>65 | 1.61<br>059<br>5  | 0.00<br>1984<br>13 | 0.02<br>1315<br>53 | 0.9<br>8  |
| Positive | GO NEGATIVE REGULATION OF IMMUNE SYSTEM PROCESS               | 439 | 0.61<br>2790<br>05 | 1.60<br>852<br>28 | 0                  | 0.02<br>2292<br>91 | 0.9<br>84 |
| Positive | GO POSITIVE REGULATION OF INTERFERON GAMMA PRODUCTION         | 64  | 0.75<br>3756<br>9  | 1.60<br>684<br>53 | 0.00<br>1862<br>2  | 0.02<br>3001<br>3  | 0.9<br>86 |
| Positive | GO REGULATION OF DNA METABOLIC PROCESS                        | 267 | 0.63<br>5463<br>95 | 1.60<br>664<br>39 | 0                  | 0.02<br>3031<br>64 | 0.9<br>86 |
| Positive | GO CHROMOSOME SEGREGATION                                     | 291 | 0.63<br>5661<br>8  | 1.60<br>656<br>12 | 0.00<br>1763<br>67 | 0.02<br>2988<br>11 | 0.9<br>87 |
| Positive | GO CELLULAR RESPONSE TO VIRUS                                 | 47  | 0.77<br>8582<br>04 | 1.60<br>625<br>41 | 0.00<br>3738<br>32 | 0.02<br>3017<br>65 | 0.9<br>9  |
| Positive | GO_CYTOPLASMIC_PATTERN_RECOGNITION_RECEPTOR_SIGNALING_PATHWAY | 56  | 0.77<br>0443<br>14 | 1.60<br>538<br>66 | 0.00<br>3656<br>31 | 0.02<br>3355<br>82 | 0.9<br>92 |
| Positive | GO CELL CYCLE DNA REPLICATION                                 | 62  | 0.75<br>6553<br>77 | 1.60<br>385<br>7  | 0.00<br>3676<br>47 | 0.02<br>3993<br>72 | 0.9<br>92 |

|          |                                                        |     |                    |                   |                    |                    |           |
|----------|--------------------------------------------------------|-----|--------------------|-------------------|--------------------|--------------------|-----------|
| Positive | GO NCRNA TRANSCRIPTION                                 | 97  | 0.70<br>8391       | 1.60<br>351<br>1  | 0.00<br>1972<br>39 | 0.02<br>4073<br>41 | 0.9<br>93 |
| Positive | GO POSITIVE REGULATION OF VIRAL TRANSCRIPTION          | 41  | 0.79<br>3385<br>5  | 1.60<br>085<br>88 | 0.00<br>5434<br>78 | 0.02<br>5334<br>06 | 0.9<br>94 |
| Positive | GO NEGATIVE REGULATION OF IMMUNE RESPONSE              | 139 | 0.68<br>2844<br>76 | 1.60<br>060<br>35 | 0.00<br>0          | 0.02<br>5352<br>95 | 0.9<br>94 |
| Positive | GO REGULATION OF VIRAL TRANSCRIPTION                   | 64  | 0.74<br>6048<br>87 | 1.60<br>017<br>97 | 0.00<br>3752<br>35 | 0.02<br>5463<br>08 | 0.9<br>95 |
| Positive | GO RESPONSE TO DSRNA                                   | 53  | 0.77<br>0993<br>05 | 1.59<br>868<br>38 | 0.00<br>5769<br>23 | 0.02<br>6121<br>63 | 0.9<br>96 |
| Positive | GO TRANSLESION SYNTHESIS                               | 38  | 0.79<br>4451<br>53 | 1.59<br>719<br>78 | 0.00<br>5714<br>29 | 0.02<br>6810<br>02 | 0.9<br>97 |
| Positive | GO TERMINATION OF RNA POLYMERASE I TRANSCRIPTION       | 30  | 0.85<br>0266<br>4  | 1.59<br>686<br>73 | 0.00<br>1872<br>66 | 0.02<br>6870<br>66 | 0.9<br>97 |
| Positive | GO REGULATION OF NATURAL KILLER CELL MEDIATED IMMUNITY | 46  | 0.78<br>6717<br>2  | 1.59<br>594<br>48 | 0.00<br>5484<br>46 | 0.02<br>7291<br>24 | 0.9<br>97 |
| Positive | VEGF A UP.VI DN                                        | 190 | 0.66<br>2528<br>5  | 1.59<br>509<br>46 | 0.00<br>0          | 0.02<br>7665<br>25 | 0.9<br>97 |
| Positive | GO TRANSCRIPTION COUPLED NUCLEOTIDE EXCISION REPAIR    | 73  | 0.72<br>8328<br>3  | 1.59<br>425<br>77 | 0.00<br>3669<br>72 | 0.02<br>8078<br>31 | 0.9<br>97 |
| Positive | GO RESPONSE TO GAMMA RADIATION                         | 53  | 0.76<br>0798<br>75 | 1.59<br>294<br>78 | 0.00<br>1953<br>13 | 0.02<br>8750<br>05 | 0.9<br>98 |
| Positive | GO RESPONSE TO INTERFERON ALPHA                        | 20  | 0.88<br>9018<br>3  | 1.59<br>289<br>96 | 0.00<br>1876<br>17 | 0.02<br>8648<br>69 | 0.9<br>98 |

|          |                                                                                                                                           |     |                    |                   |                    |                    |   |
|----------|-------------------------------------------------------------------------------------------------------------------------------------------|-----|--------------------|-------------------|--------------------|--------------------|---|
| Positive | GO RNA 5 END PROCESSING                                                                                                                   | 21  | 0.87<br>8974<br>4  | 1.59<br>166<br>74 | 0.00<br>7952<br>29 | 0.02<br>9183<br>12 | 1 |
| Positive | GO_POSITIVE_REGULATION_OF_CYTOSOLIC_CALCIIUM_ION_CONCENTRATION_INVOLVED_IN_PHOSPHOLIPASE_C_ACTIVATING_G_PROTEIN_COUPLED_SIGNALING_PATHWAY | 31  | 0.84<br>5515<br>13 | 1.59<br>132<br>33 | 0.00<br>3546<br>1  | 0.02<br>9246<br>35 | 1 |
| Positive | GO DNA SYNTHESIS INVOLVED IN DNA REPAIR                                                                                                   | 49  | 0.77<br>6392<br>94 | 1.59<br>107<br>72 | 0.00<br>5725<br>19 | 0.02<br>9283<br>06 | 1 |
| Positive | GO RNA CAPPING                                                                                                                            | 32  | 0.82<br>8514<br>1  | 1.59<br>106<br>33 | 0.00<br>3816<br>79 | 0.02<br>9176<br>17 | 1 |
| Positive | GO REGULATION OF MORPHOGENESIS OF AN EPITHELIUM                                                                                           | 179 | 0.65<br>0215<br>74 | 1.59<br>077<br>75 | 0<br>0             | 0.02<br>9202<br>74 | 1 |
| Positive | GO ACTIVATION OF INNATE IMMUNE RESPONSE                                                                                                   | 303 | 0.62<br>5962<br>73 | 1.58<br>997<br>29 | 0<br>0             | 0.02<br>9489<br>28 | 1 |
| Positive | GO TRANSCRIPTION ELONGATION FROM RNA POLYMERASE II PROMOTER                                                                               | 78  | 0.72<br>0849<br>9  | 1.58<br>977<br>95 | 0.00<br>3731<br>34 | 0.02<br>9453<br>43 | 1 |
| Positive | GO TOLERANCE INDUCTION                                                                                                                    | 24  | 0.85<br>9450<br>04 | 1.58<br>823<br>66 | 0.00<br>1890<br>36 | 0.03<br>0250<br>85 | 1 |
| Positive | GO ALPHA BETA T CELL ACTIVATION                                                                                                           | 134 | 0.67<br>7799       | 1.58<br>797<br>56 | 0<br>0             | 0.03<br>0303<br>36 | 1 |
| Positive | GO REGULATION OF RESPONSE TO BIOTIC STIMULUS                                                                                              | 128 | 0.66<br>7766<br>03 | 1.58<br>673<br>45 | 0.00<br>1798<br>56 | 0.03<br>0835<br>19 | 1 |
| Positive | GO POSITIVE T CELL SELECTION                                                                                                              | 35  | 0.81<br>8687<br>86 | 1.58<br>623<br>41 | 0.00<br>7547<br>17 | 0.03<br>0999<br>88 | 1 |
| Positive | GO_REGULATION_OF_PEPTIDYL_SERINE_PHOSPHORYLATION_OF_STAT_PROTEIN                                                                          | 23  | 0.86<br>6963<br>1  | 1.58<br>603<br>94 | 0.00<br>8032<br>13 | 0.03<br>1003<br>69 | 1 |

|          |                                                                              |         |                    |                   |                    |                    |   |
|----------|------------------------------------------------------------------------------|---------|--------------------|-------------------|--------------------|--------------------|---|
| Positive | GO TRANSCRIPTION BY RNA POLYMERASE I                                         | 61      | 0.75<br>0119<br>57 | 1.58<br>599<br>46 | 0.00<br>5484<br>46 | 0.03<br>0913<br>26 | 1 |
| Positive | GO CELLULAR DEFENSE RESPONSE                                                 | 52      | 0.76<br>7142<br>53 | 1.58<br>559<br>29 | 0.00<br>3759<br>4  | 0.03<br>1025<br>38 | 1 |
| Positive | GO REGULATION OF RESPONSE TO DNA DAMAGE STIMULUS                             | 19<br>1 | 0.64<br>4786<br>24 | 1.58<br>501<br>43 | 0.00<br>0          | 0.03<br>1224<br>83 | 1 |
| Positive | GO REGULATION OF CD4 POSITIVE ALPHA BETA T CELL DIFFERENTIATION              | 47      | 0.77<br>4786<br>8  | 1.58<br>500<br>48 | 0.00<br>7782<br>1  | 0.03<br>1105<br>29 | 1 |
| Positive | GO INTERFERON ALPHA PRODUCTION                                               | 30      | 0.82<br>8375<br>16 | 1.58<br>497<br>12 | 0.01<br>5094<br>34 | 0.03<br>1011<br>11 | 1 |
| Positive | GO LEUKOCYTE MEDIATED CYTOTOXICITY                                           | 10<br>7 | 0.70<br>3545       | 1.58<br>460<br>31 | 0.00<br>1904<br>76 | 0.03<br>1101<br>29 | 1 |
| Positive | GO REGULATION OF NATURAL KILLER CELL ACTIVATION                              | 33      | 0.80<br>9682<br>97 | 1.58<br>415<br>63 | 0.00<br>9803<br>92 | 0.03<br>1287<br>75 | 1 |
| Positive | GO REGULATION OF SYNCYTIUM FORMATION BY PLASMA MEMBRANE FUSION               | 27      | 0.84<br>7013<br>5  | 1.58<br>400<br>19 | 0.00<br>9784<br>74 | 0.03<br>1275<br>76 | 1 |
| Positive | GO T CELL PROLIFERATION                                                      | 17<br>5 | 0.64<br>9948<br>8  | 1.58<br>387<br>79 | 0.00<br>1745<br>2  | 0.03<br>1225<br>6  | 1 |
| Positive | GO RESPONSE TO INTERLEUKIN 7                                                 | 39      | 0.79<br>4362<br>2  | 1.58<br>306<br>28 | 0.00<br>3929<br>27 | 0.03<br>1601<br>54 | 1 |
| Positive | GO INNATE IMMUNE RESPONSE ACTIVATING CELL SURFACE RECEPTOR SIGNALING PATHWAY | 11<br>5 | 0.69<br>0935<br>43 | 1.58<br>275<br>65 | 0.00<br>0          | 0.03<br>1650<br>21 | 1 |
| Positive | GO REGULATION OF ALPHA BETA T CELL DIFFERENTIATION                           | 63      | 0.75<br>0023<br>96 | 1.58<br>201<br>28 | 0.00<br>3875<br>97 | 0.03<br>1982<br>4  | 1 |

|          |                                                                            |     |            |           |            |            |   |
|----------|----------------------------------------------------------------------------|-----|------------|-----------|------------|------------|---|
| Positive | GO NEGATIVE REGULATION OF LEUKOCYTE CELL CELL ADHESION                     | 122 | 0.68082654 | 1.58178   | 0          | 0.03204396 | 1 |
| Positive | MEL18 DN.V1 UP                                                             | 136 | 0.66620606 | 1.5806875 | 0          | 0.03255099 | 1 |
| Positive | GO I KAPPAB KINASE NF KAPPAB SIGNALING                                     | 256 | 0.6250968  | 1.5806057 | 0          | 0.0324831  | 1 |
| Positive | GO REGULATION OF STEM CELL DIFFERENTIATION                                 | 111 | 0.68678087 | 1.5800483 | 0          | 0.03269067 | 1 |
| Positive | GO HEMATOPOIETIC PROGENITOR CELL DIFFERENTIATION                           | 158 | 0.65764457 | 1.5769624 | 0          | 0.03455719 | 1 |
| Positive | GO RESPONSE TO IONIZING RADIATION                                          | 142 | 0.6692011  | 1.5764866 | 0          | 0.03476962 | 1 |
| Positive | GO NUCLEUS ORGANIZATION                                                    | 125 | 0.67704755 | 1.5762577 | 0          | 0.03479126 | 1 |
| Positive | GO NEGATIVE REGULATION OF DEFENSE RESPONSE                                 | 207 | 0.6436104  | 1.5762193 | 0          | 0.03468393 | 1 |
| Positive | GO POSITIVE REGULATION OF I KAPPAB KINASE NF KAPPAB SIGNALING              | 179 | 0.6500772  | 1.5759479 | 0          | 0.03471058 | 1 |
| Positive | GO_ANTIMICROBIAL_HUMORAL_IMMUNE_RESPONSE_MEDIATED_BY_ANTIMICROBIAL PEPTIDE | 72  | 0.72814035 | 1.5753165 | 0.0037594  | 0.0349741  | 1 |
| Positive | GO DNA REPLICATION INITIATION                                              | 37  | 0.8004648  | 1.5750884 | 0.00587084 | 0.03497624 | 1 |
| Positive | GO NCRNA CATABOLIC PROCESS                                                 | 27  | 0.8346705  | 1.5745391 | 0.006      | 0.03527354 | 1 |

|          |                                                                           |         |                    |                   |                    |                    |   |
|----------|---------------------------------------------------------------------------|---------|--------------------|-------------------|--------------------|--------------------|---|
| Positive | GO REGULATION OF T CELL CYTOKINE PRODUCTION                               | 30      | 0.82<br>8331<br>2  | 1.57<br>350<br>61 | 0.00<br>1897<br>53 | 0.03<br>5788<br>64 | 1 |
| Positive | GO REGULATION OF CELL CYCLE PHASE TRANSITION                              | 45<br>7 | 0.60<br>1331<br>6  | 1.57<br>289<br>6  | 0<br>0             | 0.03<br>6098<br>26 | 1 |
| Positive | GO POSITIVE REGULATION OF CYTOKINE PRODUCTION INVOLVED IN IMMUNE RESPONSE | 53      | 0.75<br>8766<br>4  | 1.57<br>239<br>17 | 0.00<br>3787<br>88 | 0.03<br>6271<br>25 | 1 |
| Positive | GO PROTEIN FOLDING                                                        | 21<br>8 | 0.63<br>8808<br>4  | 1.57<br>193<br>77 | 0<br>0             | 0.03<br>6438<br>33 | 1 |
| Positive | GO POSITIVE REGULATION OF RESPONSE TO EXTERNAL STIMULUS                   | 30<br>5 | 0.61<br>2359<br>1  | 1.57<br>077<br>41 | 0<br>0             | 0.03<br>7177<br>62 | 1 |
| Positive | GO POSITIVE REGULATION OF ALPHA BETA T CELL ACTIVATION                    | 62      | 0.73<br>2332<br>7  | 1.56<br>988<br>91 | 0.00<br>7299<br>27 | 0.03<br>7664<br>53 | 1 |
| Positive | GO MYELOID LEUKOCYTE DIFFERENTIATION                                      | 20<br>0 | 0.64<br>4420<br>86 | 1.56<br>961<br>51 | 0<br>0             | 0.03<br>7713<br>95 | 1 |
| Positive | GO TRANSCRIPTION ELONGATION FROM RNA POLYMERASE I PROMOTER                | 30      | 0.85<br>0133<br>84 | 1.56<br>905<br>22 | 0.00<br>5555<br>56 | 0.03<br>7925<br>32 | 1 |
| Positive | GO REGULATION OF ESTABLISHMENT OF PLANAR POLARITY                         | 10<br>9 | 0.67<br>7867       | 1.56<br>873<br>36 | 0.00<br>5386       | 0.03<br>7996<br>1  | 1 |
| Positive | GO NEGATIVE REGULATION OF CELL KILLING                                    | 21      | 0.88<br>9191<br>6  | 1.56<br>866<br>61 | 0.00<br>7797<br>27 | 0.03<br>7913<br>49 | 1 |
| Positive | BMI1 DN MEL18 DN.V1 UP                                                    | 14<br>1 | 0.65<br>7991<br>3  | 1.56<br>814<br>03 | 0<br>0             | 0.03<br>8183<br>16 | 1 |
| Positive | GO CYTOPLASMIC TRANSLATION                                                | 93      | 0.70<br>2079<br>8  | 1.56<br>767<br>38 | 0.00<br>5226<br>48 | 0.03<br>8329<br>9  | 1 |

|          |                                                                                              |         |                    |                   |                    |                    |   |
|----------|----------------------------------------------------------------------------------------------|---------|--------------------|-------------------|--------------------|--------------------|---|
| Positive | GO REGULATION OF MONOCYTE DIFFERENTIATION                                                    | 21      | 0.88<br>8768<br>4  | 1.56<br>665<br>65 | 0.00<br>1851<br>85 | 0.03<br>8825<br>86 | 1 |
| Positive | GO PROTEIN LOCALIZATION TO CHROMOSOME                                                        | 75      | 0.71<br>7508<br>9  | 1.56<br>543<br>21 | 0.00<br>3696<br>86 | 0.03<br>9525<br>17 | 1 |
| Positive | GO B CELL HOMEOSTASIS                                                                        | 29      | 0.83<br>5145<br>4  | 1.56<br>521<br>08 | 0.00<br>5952<br>38 | 0.03<br>9541<br>2  | 1 |
| Positive | GO PROGRAMMED NECROTIC CELL DEATH                                                            | 47      | 0.77<br>0890<br>4  | 1.56<br>502<br>96 | 0.00<br>7380<br>07 | 0.03<br>9514<br>9  | 1 |
| Positive | GO NEGATIVE REGULATION OF MITOTIC CELL CYCLE                                                 | 31<br>6 | 0.61<br>5413<br>37 | 1.56<br>499<br>1  | 0<br>0             | 0.03<br>9386<br>35 | 1 |
| Positive | GO_MATURATION_OF_5_8S_RRNA_FROM_TRICISTRONIC_RRNA_TRANSCRIPT_<br>SSU_RRNA_5_8S_RRNA_LSU_RRNA | 21      | 0.87<br>9656<br>26 | 1.56<br>454<br>99 | 0.00<br>1976<br>28 | 0.03<br>9538<br>39 | 1 |
| Positive | GO REGULATION OF CALCIUM ION TRANSPORT INTO CYTOSOL                                          | 99      | 0.69<br>3963<br>77 | 1.56<br>408<br>24 | 0.00<br>3745<br>32 | 0.03<br>9668<br>98 | 1 |
| Positive | GO NUCLEAR DNA REPLICATION                                                                   | 54      | 0.75<br>9442<br>87 | 1.56<br>374<br>94 | 0.00<br>9259<br>26 | 0.03<br>9768<br>86 | 1 |
| Positive | GO T HELPER 17 TYPE IMMUNE RESPONSE                                                          | 28      | 0.83<br>0004<br>33 | 1.56<br>266<br>7  | 0.00<br>5454<br>55 | 0.04<br>0463<br>95 | 1 |
| Positive | GO NCRNA 3 END PROCESSING                                                                    | 37      | 0.80<br>183        | 1.56<br>231<br>24 | 0.00<br>2083<br>33 | 0.04<br>0517<br>67 | 1 |
| Positive | GO GLYCOSYL COMPOUND BIOSYNTHETIC PROCESS                                                    | 39      | 0.79<br>1264<br>3  | 1.56<br>214<br>49 | 0.00<br>5692<br>6  | 0.04<br>0525<br>8  | 1 |
| Positive | GO REGULATION OF INFLAMMATORY RESPONSE                                                       | 34<br>3 | 0.60<br>4094<br>7  | 1.56<br>191<br>23 | 0<br>0             | 0.04<br>0563<br>55 | 1 |

|          |                                                             |     |            |           |            |            |   |
|----------|-------------------------------------------------------------|-----|------------|-----------|------------|------------|---|
| Positive | GO DNA RECOMBINATION                                        | 263 | 0.6219674  | 1.5616796 | 0.00172712 | 0.04060045 | 1 |
| Positive | GO REGULATION OF CELL CELL ADHESION                         | 386 | 0.6005968  | 1.5615287 | 0          | 0.04055032 | 1 |
| Positive | GO RESPONSE TO INTERLEUKIN 12                               | 503 | 0.7480503  | 1.5600773 | 0.00914077 | 0.04141192 | 1 |
| Positive | GO POSITIVE REGULATION OF DNA METABOLIC PROCESS             | 146 | 0.6571284  | 1.5596571 | 0          | 0.04158886 | 1 |
| Positive | GO REGULATION OF MYELOID LEUKOCYTE DIFFERENTIATION          | 117 | 0.6718897  | 1.5594462 | 0          | 0.04159799 | 1 |
| Positive | GO T CELL CYTOKINE PRODUCTION                               | 399 | 0.7898879  | 1.5591397 | 0.00731261 | 0.0416966  | 1 |
| Positive | GO SISTER CHROMATID SEGREGATION                             | 178 | 0.64363843 | 1.5588344 | 0          | 0.04177346 | 1 |
| Positive | GO REGULATION OF GRANULOCYTE CHEMOTAXIS                     | 411 | 0.7809731  | 1.5586789 | 0.00558659 | 0.04174893 | 1 |
| Positive | GO LYMPHOCYTE ACTIVATION INVOLVED IN IMMUNE RESPONSE        | 172 | 0.6398614  | 1.5569239 | 0          | 0.04299128 | 1 |
| Positive | GO POSITIVE REGULATION OF ALPHA BETA T CELL DIFFERENTIATION | 474 | 0.7598614  | 1.5567881 | 0.00764818 | 0.04293875 | 1 |
| Positive | GO HISTONE EXCHANGE                                         | 559 | 0.7497819  | 1.5559807 | 0.00344234 | 0.04340288 | 1 |
| Positive | BMI1 DN.V1 UP                                               | 142 | 0.6593644  | 1.5547053 | 0.00178891 | 0.04415608 | 1 |



|          |                                                                                                  |     |            |           |            |            |   |
|----------|--------------------------------------------------------------------------------------------------|-----|------------|-----------|------------|------------|---|
| Positive | GO REGULATION OF DNA BIOSYNTHETIC PROCESS                                                        | 102 | 0.6838056  | 1.554536  | 0.00181159 | 0.04416415 | 1 |
| Positive | GO_POSITIVE_REGULATION_OF_NATURAL_KILLER_CELL_MEDIATED_IMMUNITY                                  | 33  | 0.8020611  | 1.5538402 | 0.00735294 | 0.04458548 | 1 |
| Positive | GO_MODIFICATION_OF_MORPHOLOGY_OR_PHYSIOLOGY_OF_OTHER_ORGANISMS_INVOLVED_IN_SYMBIOTIC_INTERACTION | 110 | 0.6752669  | 1.5536914 | 0.00182815 | 0.04452462 | 1 |
| Positive | GO_NUCLEAR_CHROMOSOME_SEGREGATION                                                                | 240 | 0.6183649  | 1.5532932 | 0.000      | 0.0446888  | 1 |
| Positive | GO_POSITIVE_REGULATION_OF_RNA_METABOLIC_PROCESS                                                  | 69  | 0.7157826  | 1.5515084 | 0.00560748 | 0.04599967 | 1 |
| Positive | GO_CENTROMERE_COMPLEX_ASSEMBLY                                                                   | 51  | 0.7561084  | 1.5509582 | 0.00919118 | 0.04623351 | 1 |
| Positive | GO_REGULATION_OF_DNA_REPLICATION                                                                 | 102 | 0.6768263  | 1.550887  | 0.00185185 | 0.04616827 | 1 |
| Positive | HALLMARK_UNFOLDED_PROTEIN_RESPONSE                                                               | 109 | 0.676373   | 1.5506496 | 0.00190114 | 0.04617659 | 1 |
| Positive | GO_CELLULAR_RESPONSE_TO_BIOTIC_STIMULUS                                                          | 225 | 0.62659305 | 1.5500591 | 0.000      | 0.04649598 | 1 |
| Positive | GO_RESPONSE_TO_CHEMOKINE                                                                         | 92  | 0.6885604  | 1.5498616 | 0.0018018  | 0.04652276 | 1 |
| Positive | HALLMARK_IL2_STAT5_SIGNALING                                                                     | 196 | 0.63536996 | 1.5475441 | 0.000      | 0.04823072 | 1 |
| Positive | GO_REGULATION_OF_ANTIGEN_PROCESSING_AND_PRESENTATION                                             | 18  | 0.8888893  | 1.5475013 | 0.00974659 | 0.04812944 | 1 |

|             |                                                     |         |                         |                        |                    |                    |            |
|-------------|-----------------------------------------------------|---------|-------------------------|------------------------|--------------------|--------------------|------------|
| Positive    | GO NEGATIVE REGULATION OF INTERLEUKIN 10 PRODUCTION | 17      | 0.91<br>3473<br>2       | 1.54<br>722<br>1       | 0.00<br>4098<br>36 | 0.04<br>8189<br>96 | 1          |
| Positive    | GO LYMPHOCYTE DIFFERENTIATION                       | 34<br>2 | 0.60<br>3788<br>73      | 1.54<br>684<br>44      | 0                  | 0.04<br>8380<br>07 | 1          |
| Correlation | FGF2 Control                                        | SIZE    | ES                      | NES                    | NOM p-val          | FDR q-val          | FWER p-val |
| Negative    | KRAS.LUNG UP.V1 DN                                  | 14<br>0 | -<br>0.77<br>5826<br>63 | -<br>1.93<br>818<br>64 | 0                  | 0                  | 0          |
| Negative    | KRAS.600 UP.V1 DN                                   | 27<br>2 | -<br>0.69<br>8298<br>7  | -<br>1.87<br>687       | 0                  | 6.05<br>E-04       | 0.0<br>02  |
| Negative    | KRAS.600.LUNG.BREAST UP.V1 DN                       | 27<br>5 | -<br>0.67<br>4714<br>27 | -<br>1.82<br>612<br>86 | 0                  | 0.00<br>4010<br>92 | 0.0<br>2   |
| Negative    | KRAS.LUNG.BREAST UP.V1 DN                           | 13<br>7 | -<br>0.71<br>9078<br>4  | -<br>1.79<br>675<br>04 | 0                  | 0.01<br>1005<br>73 | 0.0<br>72  |
| Negative    | KRAS.300 UP.V1 DN                                   | 13<br>5 | -<br>0.70<br>1283<br>34 | -<br>1.76<br>745<br>38 | 0                  | 0.02<br>2421<br>89 | 0.1<br>75  |
| Positive    | HALLMARK MYC TARGETS V1                             | 19<br>7 | 0.88<br>8230<br>3       | 2.13<br>763<br>14      | 0                  | 0                  | 0          |

|          |                                                                       |     |            |           |   |   |   |
|----------|-----------------------------------------------------------------------|-----|------------|-----------|---|---|---|
| Positive | GO_RIBOSOME_BIOGENESIS                                                | 264 | 0.8613736  | 2.1171236 | 0 | 0 | 0 |
| Positive | GO_RIBONUCLEOPROTEIN_COMPLEX_BIOGENESIS                               | 454 | 0.82600915 | 2.1006813 | 0 | 0 | 0 |
| Positive | GO_NCRNA_METABOLIC_PROCESS                                            | 428 | 0.8258835  | 2.0846767 | 0 | 0 | 0 |
| Positive | GO_NCRNA_PROCESSING                                                   | 352 | 0.8313273  | 2.0805058 | 0 | 0 | 0 |
| Positive | GO_RRNA_METABOLIC_PROCESS                                             | 194 | 0.8563418  | 2.057439  | 0 | 0 | 0 |
| Positive | HALLMARK_E2F_TARGETS                                                  | 197 | 0.8215042  | 1.9815567 | 0 | 0 | 0 |
| Positive | GO_MITOCHONDRIAL_GENE_EXPRESSION                                      | 151 | 0.8458019  | 1.9805963 | 0 | 0 | 0 |
| Positive | GO_MITOCHONDRIAL_TRANSLATION                                          | 129 | 0.8505818  | 1.9555104 | 0 | 0 | 0 |
| Positive | GO_RIBONUCLEOPROTEIN_COMPLEX_SUBUNIT_ORGANIZATION                     | 268 | 0.79622877 | 1.9548925 | 0 | 0 | 0 |
| Positive | GO_COTRANSLATIONAL_PROTEIN_TARGETING_TO_MEMBRANE                      | 102 | 0.8803201  | 1.9531101 | 0 | 0 | 0 |
| Positive | GO_TRANSLATIONAL_INITIATION                                           | 190 | 0.81442815 | 1.9489046 | 0 | 0 | 0 |
| Positive | GO_NUCLEAR_TRANSCRIBED_MRNA_CATABOLIC_PROCESS_NONSENSE_MEDIATED_DECAY | 118 | 0.8591481  | 1.9396626 | 0 | 0 | 0 |

|          |                                                                   |     |            |           |   |   |   |
|----------|-------------------------------------------------------------------|-----|------------|-----------|---|---|---|
| Positive | GO TRNA METABOLIC PROCESS                                         | 172 | 0.810916   | 1.9319206 | 0 | 0 | 0 |
| Positive | GO RNA SPLICING VIA TRANSESTERIFICATION REACTIONS                 | 364 | 0.7649295  | 1.9155345 | 0 | 0 | 0 |
| Positive | GO RNA EXPORT FROM NUCLEUS                                        | 136 | 0.82730263 | 1.9128438 | 0 | 0 | 0 |
| Positive | GO_ESTABLISHMENT_OF_PROTEIN_LOCALIZATION_TO_ENDOPLASMIC_RETICULUM | 115 | 0.8485687  | 1.9120183 | 0 | 0 | 0 |
| Positive | GO TRANSLATIONAL TERMINATION                                      | 102 | 0.8524586  | 1.9011234 | 0 | 0 | 0 |
| Positive | HALLMARK MYC TARGETS V2                                           | 58  | 0.9074457  | 1.8977801 | 0 | 0 | 0 |
| Positive | GO RIBOSOMAL LARGE SUBUNIT BIOGENESIS                             | 66  | 0.8924492  | 1.8897505 | 0 | 0 | 0 |
| Positive | GO MITOCHONDRIAL TRANSLATIONAL TERMINATION                        | 87  | 0.8569772  | 1.8894997 | 0 | 0 | 0 |
| Positive | HALLMARK G2M CHECKPOINT                                           | 192 | 0.7871618  | 1.8860937 | 0 | 0 | 0 |
| Positive | GO PROTEIN DNA COMPLEX SUBUNIT ORGANIZATION                       | 276 | 0.76731974 | 1.8782425 | 0 | 0 | 0 |
| Positive | GO DNA CONFORMATION CHANGE                                        | 294 | 0.7536664  | 1.8736281 | 0 | 0 | 0 |
| Positive | GO RNA 3 END PROCESSING                                           | 136 | 0.79742235 | 1.8696054 | 0 | 0 | 0 |

|          |                                                  |     |                    |                   |   |   |   |
|----------|--------------------------------------------------|-----|--------------------|-------------------|---|---|---|
| Positive | GO RNA SPLICING                                  | 447 | 0.73<br>6796<br>44 | 1.86<br>518<br>61 | 0 | 0 | 0 |
| Positive | GO VIRAL GENE EXPRESSION                         | 189 | 0.78<br>7238<br>96 | 1.86<br>406<br>35 | 0 | 0 | 0 |
| Positive | GO TRNA PROCESSING                               | 125 | 0.81<br>2608<br>36 | 1.85<br>783<br>62 | 0 | 0 | 0 |
| Positive | GO MRNA EXPORT FROM NUCLEUS                      | 110 | 0.81<br>8157<br>14 | 1.85<br>218<br>92 | 0 | 0 | 0 |
| Positive | CSR EARLY UP.V1 UP                               | 144 | 0.80<br>1807       | 1.85<br>144<br>53 | 0 | 0 | 0 |
| Positive | GO NUCLEOSOME ORGANIZATION                       | 177 | 0.78<br>3504<br>7  | 1.84<br>750<br>46 | 0 | 0 | 0 |
| Positive | GO RIBOSOME ASSEMBLY                             | 56  | 0.88<br>9381<br>6  | 1.84<br>635<br>6  | 0 | 0 | 0 |
| Positive | GO NUCLEAR EXPORT                                | 194 | 0.76<br>6407<br>9  | 1.84<br>255<br>21 | 0 | 0 | 0 |
| Positive | GO PROTEIN LOCALIZATION TO ENDOPLASMIC RETICULUM | 139 | 0.79<br>3560<br>27 | 1.84<br>251<br>75 | 0 | 0 | 0 |
| Positive | GO DNA TEMPLATED TRANSCRIPTION TERMINATION       | 71  | 0.85<br>2735<br>9  | 1.83<br>743<br>02 | 0 | 0 | 0 |
| Positive | GO DNA PACKAGING                                 | 202 | 0.76<br>6077<br>34 | 1.83<br>019<br>8  | 0 | 0 | 0 |
| Positive | GO RIBOSOMAL SMALL SUBUNIT BIOGENESIS            | 60  | 0.87<br>5143<br>1  | 1.82<br>769<br>33 | 0 | 0 | 0 |

|          |                                               |     |                |               |   |              |           |
|----------|-----------------------------------------------|-----|----------------|---------------|---|--------------|-----------|
| Positive | MYC UP.V1 UP                                  | 165 | 0.77<br>60886  | 1.82<br>73318 | 0 | 0            | 0         |
| Positive | CSR LATE UP.V1 UP                             | 162 | 0.77<br>18832  | 1.82<br>29833 | 0 | 0            | 0         |
| Positive | GO RNA LOCALIZATION                           | 225 | 0.75<br>548875 | 1.81<br>86074 | 0 | 0            | 0         |
| Positive | GO CHROMATIN ASSEMBLY                         | 161 | 0.76<br>85683  | 1.81<br>75946 | 0 | 0            | 0         |
| Positive | GO NUCLEAR TRANSCRIBED MRNA CATABOLIC PROCESS | 196 | 0.74<br>73979  | 1.80<br>49563 | 0 | 2.93<br>E-05 | 0.0<br>01 |
| Positive | VEGF A UP.V1 DN                               | 190 | 0.75<br>462705 | 1.80<br>4688  | 0 | 2.86<br>E-05 | 0.0<br>01 |
| Positive | GO TELOMERE ORGANIZATION                      | 170 | 0.76<br>28874  | 1.80<br>44596 | 0 | 2.80<br>E-05 | 0.0<br>01 |
| Positive | GO RNA CATABOLIC PROCESS                      | 380 | 0.70<br>87321  | 1.78<br>42686 | 0 | 5.45<br>E-05 | 0.0<br>02 |
| Positive | GO CHROMATIN ASSEMBLY OR DISASSEMBLY          | 187 | 0.75<br>153625 | 1.78<br>25218 | 0 | 5.33<br>E-05 | 0.0<br>02 |
| Positive | GO CYTOPLASMIC TRANSLATION                    | 93  | 0.80<br>360293 | 1.78<br>06782 | 0 | 5.21<br>E-05 | 0.0<br>02 |
| Positive | GO TRANSLATIONAL ELONGATION                   | 129 | 0.77<br>43524  | 1.77<br>71695 | 0 | 5.10<br>E-05 | 0.0<br>02 |
| Positive | GO MRNA 3 END PROCESSING                      | 96  | 0.78<br>58801  | 1.76<br>51681 | 0 | 1.24<br>E-04 | 0.0<br>05 |

|          |                                                     |     |                    |                   |   |              |           |
|----------|-----------------------------------------------------|-----|--------------------|-------------------|---|--------------|-----------|
| Positive | GO DNA REPLICATION                                  | 261 | 0.71<br>5189<br>16 | 1.76<br>511<br>65 | 0 | 1.22<br>E-04 | 0.0<br>05 |
| Positive | GO DNA TEMPLATED TRANSCRIPTION ELONGATION           | 105 | 0.78<br>2794<br>36 | 1.76<br>168<br>7  | 0 | 1.19<br>E-04 | 0.0<br>05 |
| Positive | GO TRNA MODIFICATION                                | 82  | 0.80<br>4982<br>84 | 1.75<br>902<br>58 | 0 | 1.40<br>E-04 | 0.0<br>06 |
| Positive | GO ESTABLISHMENT OF RNA LOCALIZATION                | 192 | 0.74<br>6766<br>27 | 1.75<br>425<br>31 | 0 | 1.83<br>E-04 | 0.0<br>08 |
| Positive | GO ATP DEPENDENT CHROMATIN REMODELING               | 78  | 0.80<br>2380<br>74 | 1.75<br>181<br>5  | 0 | 2.02<br>E-04 | 0.0<br>09 |
| Positive | GO NCRNA TRANSCRIPTION                              | 97  | 0.78<br>1359<br>3  | 1.75<br>180<br>33 | 0 | 1.98<br>E-04 | 0.0<br>09 |
| Positive | GO CHROMOSOME SEGREGATION                           | 291 | 0.70<br>5347<br>3  | 1.74<br>198<br>4  | 0 | 3.46<br>E-04 | 0.0<br>16 |
| Positive | GO MRNA TRANSPORT                                   | 147 | 0.73<br>9389<br>4  | 1.74<br>197<br>39 | 0 | 3.40<br>E-04 | 0.0<br>16 |
| Positive | GO SPLICEOSOMAL SNRNP ASSEMBLY                      | 53  | 0.85<br>3550<br>4  | 1.74<br>152<br>2  | 0 | 3.34<br>E-04 | 0.0<br>16 |
| Positive | GO MITOTIC NUCLEAR DIVISION                         | 273 | 0.70<br>6813<br>45 | 1.74<br>089<br>98 | 0 | 3.28<br>E-04 | 0.0<br>16 |
| Positive | GO NUCLEAR TRANSPORT                                | 335 | 0.69<br>3973<br>66 | 1.73<br>542<br>46 | 0 | 3.63<br>E-04 | 0.0<br>18 |
| Positive | GO REGULATION OF POSTTRANSCRIPTIONAL GENE SILENCING | 113 | 0.75<br>6600<br>6  | 1.73<br>537<br>55 | 0 | 3.57<br>E-04 | 0.0<br>18 |

|          |                                         |     |                    |                   |   |                    |           |
|----------|-----------------------------------------|-----|--------------------|-------------------|---|--------------------|-----------|
| Positive | GO PROTEIN TARGETING TO MEMBRANE        | 191 | 0.72<br>7419<br>8  | 1.73<br>493<br>59 | 0 | 3.71<br>E-04       | 0.0<br>19 |
| Positive | GO RNA MODIFICATION                     | 152 | 0.73<br>0068<br>86 | 1.73<br>064<br>35 | 0 | 4.60<br>E-04       | 0.0<br>24 |
| Positive | GO DNA DEPENDENT DNA REPLICATION        | 139 | 0.74<br>6952<br>35 | 1.73<br>038<br>45 | 0 | 4.53<br>E-04       | 0.0<br>24 |
| Positive | GO REGULATION OF GENE SILENCING         | 148 | 0.74<br>2964<br>8  | 1.72<br>672<br>43 | 0 | 5.39<br>E-04       | 0.0<br>29 |
| Positive | GO CENTROMERE COMPLEX ASSEMBLY          | 51  | 0.82<br>1793<br>4  | 1.71<br>962<br>27 | 0 | 7.33<br>E-04       | 0.0<br>39 |
| Positive | GO PROTEIN LOCALIZATION TO CHROMOSOME   | 75  | 0.79<br>5227<br>2  | 1.71<br>572<br>88 | 0 | 8.12<br>E-04       | 0.0<br>44 |
| Positive | GO MITOTIC SISTER CHROMATID SEGREGATION | 144 | 0.73<br>2687<br>83 | 1.71<br>501<br>16 | 0 | 8.18<br>E-04       | 0.0<br>45 |
| Positive | GO NUCLEUS ORGANIZATION                 | 125 | 0.74<br>8051<br>5  | 1.70<br>829<br>49 | 0 | 9.64<br>E-04       | 0.0<br>54 |
| Positive | GO MATURATION OF SSU RRNA               | 42  | 0.87<br>5169<br>5  | 1.70<br>643<br>01 | 0 | 0.00<br>1036<br>7  | 0.0<br>59 |
| Positive | GO REGULATION OF MRNA PROCESSING        | 137 | 0.73<br>3758<br>3  | 1.69<br>818<br>43 | 0 | 0.00<br>1348<br>48 | 0.0<br>77 |
| Positive | GO CELLULAR PROTEIN COMPLEX DISASSEMBLY | 209 | 0.69<br>4751<br>6  | 1.69<br>311<br>02 | 0 | 0.00<br>1498<br>26 | 0.0<br>86 |
| Positive | GO SISTER CHROMATID SEGREGATION         | 178 | 0.71<br>1755<br>2  | 1.68<br>706<br>3  | 0 | 0.00<br>1843<br>67 | 0.1<br>07 |



|          |                                                                   |     |            |           |   |            |       |
|----------|-------------------------------------------------------------------|-----|------------|-----------|---|------------|-------|
| Positive | GO NUCLEAR CHROMOSOME SEGREGATION                                 | 240 | 0.6902407  | 1.68239   | 0 | 0.00201517 | 0.119 |
| Positive | GO NCRNA EXPORT FROM NUCLEUS                                      | 383 | 0.85644233 | 1.6821171 | 0 | 0.0019883  | 0.119 |
| Positive | GO REGULATION OF DNA BIOSYNTHETIC PROCESS                         | 102 | 0.74557024 | 1.6788954 | 0 | 0.00225117 | 0.137 |
| Positive | GO HISTONE EXCHANGE                                               | 558 | 0.8108608  | 1.6785281 | 0 | 0.00223772 | 0.138 |
| Positive | GO REGULATION OF MRNA SPLICING VIA SPLICEOSOME                    | 100 | 0.7529516  | 1.6768435 | 0 | 0.00236466 | 0.147 |
| Positive | GO NUCLEIC ACID PHOSPHODIESTER BOND HYDROLYSIS                    | 282 | 0.67791724 | 1.6739255 | 0 | 0.0026717  | 0.162 |
| Positive | GO REGULATION OF NUCLEOBASE CONTAINING COMPOUND METABOLIC PROCESS | 489 | 0.6535058  | 1.6729494 | 0 | 0.00269885 | 0.166 |
| Positive | GO REGULATION OF RNA METABOLIC PROCESS                            | 218 | 0.6950696  | 1.6704874 | 0 | 0.0028147  | 0.175 |
| Positive | GO RIBOSOMAL LARGE SUBUNIT ASSEMBLY                               | 298 | 0.9031338  | 1.6701258 | 0 | 0.00282464 | 0.178 |
| Positive | GO NUCLEOBASE CONTAINING COMPOUND TRANSPORT                       | 234 | 0.68773764 | 1.6700939 | 0 | 0.00279061 | 0.178 |
| Positive | GO MATURATION OF 5 8S RRNA                                        | 269 | 0.9055649  | 1.6680235 | 0 | 0.0030022  | 0.193 |
| Positive | GO DNA BIOSYNTHETIC PROCESS                                       | 181 | 0.70207864 | 1.667802  | 0 | 0.00299532 | 0.195 |

|          |                                                                                             |         |                    |                   |                    |                    |           |
|----------|---------------------------------------------------------------------------------------------|---------|--------------------|-------------------|--------------------|--------------------|-----------|
| Positive | GO TELOMERE MAINTENANCE VIA TELOMERE LENGTHENING                                            | 79      | 0.76<br>6616<br>94 | 1.66<br>659<br>36 | 0                  | 0.00<br>3045<br>37 | 0.2<br>01 |
| Positive | GO TRANSCRIPTION ELONGATION FROM RNA POLYMERASE II PROMOTER                                 | 78      | 0.76<br>2639<br>34 | 1.66<br>369<br>14 | 0.00<br>1510<br>57 | 0.00<br>3457<br>25 | 0.2<br>25 |
| Positive | GO TRANSCRIPTION BY RNA POLYMERASE I                                                        | 61      | 0.78<br>6581<br>3  | 1.66<br>358<br>34 | 0                  | 0.00<br>3431<br>8  | 0.2<br>26 |
| Positive | GO_MATURATION_OF_SSU_RRNA_FROM_TRICISTRONIC_RRNA_TRANSCRIPT_S<br>SU_RRNA_5_8S_RRNA_LSU_RRNA | 32      | 0.88<br>8074<br>9  | 1.66<br>243<br>78 | 0                  | 0.00<br>3529<br>07 | 0.2<br>34 |
| Positive | GO TRANSCRIPTION COUPLED NUCLEOTIDE EXCISION REPAIR                                         | 73      | 0.77<br>2733<br>45 | 1.66<br>079<br>1  | 0                  | 0.00<br>3677<br>51 | 0.2<br>45 |
| Positive | GO DNA REPLICATION INDEPENDENT NUCLEOSOME ORGANIZATION                                      | 52      | 0.81<br>5834<br>7  | 1.66<br>032<br>99 | 0                  | 0.00<br>3730<br>59 | 0.2<br>51 |
| Positive | KRAS.600 UP.V1 UP                                                                           | 27<br>4 | 0.67<br>0702<br>3  | 1.65<br>514<br>99 | 0                  | 0.00<br>4480<br>61 | 0.2<br>97 |
| Positive | GO RNA PHOSPHODIESTER BOND HYDROLYSIS                                                       | 14<br>3 | 0.71<br>5398<br>7  | 1.65<br>407<br>73 | 0                  | 0.00<br>4549<br>9  | 0.3<br>03 |
| Positive | KRAS.50 UP.V1 UP                                                                            | 48      | 0.80<br>8006<br>05 | 1.65<br>379<br>27 | 0                  | 0.00<br>4540<br>28 | 0.3<br>04 |
| Positive | GO TRNA TRANSPORT                                                                           | 35      | 0.86<br>0191<br>8  | 1.65<br>358<br>92 | 0                  | 0.00<br>4518<br>22 | 0.3<br>06 |
| Positive | GO NCRNA 3 END PROCESSING                                                                   | 37      | 0.84<br>8917<br>8  | 1.65<br>300<br>57 | 0.00<br>1633<br>99 | 0.00<br>4585<br>18 | 0.3<br>11 |
| Positive | GO_CHROMATIN_ORGANIZATION_INVOLVED_IN_REGULATION_OF_TRANSCRI<br>PTION                       | 12<br>4 | 0.72<br>0090<br>45 | 1.65<br>223<br>68 | 0                  | 0.00<br>4599<br>91 | 0.3<br>15 |

|          |                                                      |     |                    |                   |   |                    |           |
|----------|------------------------------------------------------|-----|--------------------|-------------------|---|--------------------|-----------|
| Positive | GO AMINO ACID ACTIVATION                             | 48  | 0.81<br>3929<br>2  | 1.65<br>163<br>96 | 0 | 0.00<br>4627<br>4  | 0.3<br>19 |
| Positive | GO MITOCHONDRIAL RESPIRATORY CHAIN COMPLEX ASSEMBLY  | 90  | 0.74<br>8086<br>04 | 1.65<br>163<br>39 | 0 | 0.00<br>4580<br>66 | 0.3<br>19 |
| Positive | GO NEGATIVE REGULATION OF GENE EXPRESSION EPIGENETIC | 132 | 0.71<br>0238<br>75 | 1.65<br>023<br>4  | 0 | 0.00<br>4740<br>47 | 0.3<br>33 |
| Positive | E2F1 UP.V1 UP                                        | 177 | 0.69<br>4854<br>74 | 1.64<br>877<br>02 | 0 | 0.00<br>4933<br>05 | 0.3<br>47 |
| Positive | GO PROTEIN FOLDING                                   | 218 | 0.68<br>6297<br>54 | 1.64<br>783<br>61 | 0 | 0.00<br>5111<br>25 | 0.3<br>6  |
| Positive | RPS14 DN.V1 DN                                       | 178 | 0.69<br>1975<br>9  | 1.64<br>692<br>18 | 0 | 0.00<br>5215<br>12 | 0.3<br>72 |
| Positive | GO MULTI ORGANISM LOCALIZATION                       | 69  | 0.76<br>4520<br>4  | 1.64<br>634<br>53 | 0 | 0.00<br>5245<br>74 | 0.3<br>77 |
| Positive | GO CHROMATIN SILENCING AT RDNA                       | 40  | 0.83<br>2503<br>9  | 1.64<br>150<br>66 | 0 | 0.00<br>6338<br>55 | 0.4<br>3  |
| Positive | GO REGULATION OF CELL CYCLE G2 M PHASE TRANSITION    | 207 | 0.68<br>0549<br>44 | 1.64<br>070<br>14 | 0 | 0.00<br>6472<br>96 | 0.4<br>37 |
| Positive | GO SNRNA TRANSCRIPTION                               | 67  | 0.77<br>4632<br>9  | 1.63<br>820<br>86 | 0 | 0.00<br>7012<br>52 | 0.4<br>72 |
| Positive | KRAS.300 UP.V1 UP                                    | 141 | 0.70<br>2480<br>8  | 1.63<br>694<br>45 | 0 | 0.00<br>7272<br>8  | 0.4<br>87 |
| Positive | GO CHROMOSOME LOCALIZATION                           | 71  | 0.77<br>1603<br>6  | 1.63<br>683<br>82 | 0 | 0.00<br>7217<br>09 | 0.4<br>88 |

|          |                                                            |     |            |           |            |            |       |
|----------|------------------------------------------------------------|-----|------------|-----------|------------|------------|-------|
| Positive | GO ESTABLISHMENT OF PROTEIN LOCALIZATION TO MEMBRANE       | 313 | 0.6579502  | 1.6362166 | 0          | 0.00719573 | 0.489 |
| Positive | GO NEGATIVE REGULATION OF CELL CYCLE G2 M PHASE TRANSITION | 98  | 0.73655045 | 1.6334805 | 0          | 0.00796175 | 0.532 |
| Positive | GO POSITIVE REGULATION OF VIRAL TRANSCRIPTION              | 41  | 0.8259129  | 1.6308765 | 0          | 0.00846542 | 0.557 |
| Positive | GO TRANSPORT OF VIRUS                                      | 57  | 0.78010046 | 1.6298196 | 0.00309119 | 0.00868032 | 0.572 |
| Positive | GO POSITIVE REGULATION OF DNA BIOSYNTHETIC PROCESS         | 66  | 0.76644164 | 1.6265811 | 0          | 0.00941312 | 0.605 |
| Positive | GO CHROMATIN REMODELING AT CENTROMERE                      | 43  | 0.8235702  | 1.625965  | 0.0015949  | 0.00955264 | 0.612 |
| Positive | GO NUCLEOTIDE EXCISION REPAIR                              | 108 | 0.7176641  | 1.6254656 | 0.00306279 | 0.00962674 | 0.617 |
| Positive | MEL18 DN.V1 UP                                             | 136 | 0.70327014 | 1.6250697 | 0          | 0.00963801 | 0.621 |
| Positive | GO REGULATION OF DNA REPLICATION                           | 102 | 0.7301626  | 1.6248801 | 0          | 0.00958695 | 0.623 |
| Positive | GO ANAPHASE PROMOTING COMPLEX DEPENDENT CATABOLIC PROCESS  | 81  | 0.75235975 | 1.6242986 | 0          | 0.00960917 | 0.627 |
| Positive | GO REGULATION OF CELLULAR RESPONSE TO HEAT                 | 77  | 0.7501906  | 1.6241151 | 0          | 0.00957946 | 0.629 |
| Positive | HALLMARK UNFOLDED PROTEIN RESPONSE                         | 109 | 0.71545017 | 1.6238085 | 0          | 0.00964082 | 0.636 |

|          |                                                                            |     |            |           |            |            |       |
|----------|----------------------------------------------------------------------------|-----|------------|-----------|------------|------------|-------|
| Positive | GO REGULATION OF DNA METABOLIC PROCESS                                     | 267 | 0.663308   | 1.6182345 | 0          | 0.01105159 | 0.688 |
| Positive | GO PROTEIN CONTAINING COMPLEX DISASSEMBLY                                  | 315 | 0.65097386 | 1.6157043 | 0          | 0.0118191  | 0.718 |
| Positive | GO DNA REPLICATION INITIATION                                              | 37  | 0.82977563 | 1.6154686 | 0          | 0.01179258 | 0.72  |
| Positive | GO REGULATION OF CHROMOSOME SEGREGATION                                    | 99  | 0.7225522  | 1.614899  | 0.00150602 | 0.01187234 | 0.726 |
| Positive | GO MICROTUBULE CYTOSKELETON ORGANIZATION INVOLVED IN MITOSIS               | 120 | 0.6973619  | 1.6148217 | 0          | 0.01183594 | 0.73  |
| Positive | GO NADH DEHYDROGENASE COMPLEX ASSEMBLY                                     | 61  | 0.76930624 | 1.613727  | 0          | 0.01219195 | 0.74  |
| Positive | GO RNA DEPENDENT DNA BIOSYNTHETIC PROCESS                                  | 69  | 0.7601232  | 1.6129497 | 0          | 0.01229601 | 0.748 |
| Positive | HALLMARK OXIDATIVE PHOSPHORYLATION                                         | 184 | 0.67935675 | 1.6122321 | 0          | 0.01243566 | 0.758 |
| Positive | GO DNA GEOMETRIC CHANGE                                                    | 91  | 0.7275163  | 1.6111825 | 0.00154321 | 0.01268521 | 0.765 |
| Positive | GO METAPHASE PLATE CONGRESSION                                             | 56  | 0.7790876  | 1.610703  | 0          | 0.0127551  | 0.772 |
| Positive | GO POSITIVE REGULATION OF NUCLEOBASE CONTAINING COMPOUND METABOLIC PROCESS | 218 | 0.66590774 | 1.6105777 | 0          | 0.01270463 | 0.774 |
| Positive | GO RNA METHYLATION                                                         | 72  | 0.7460393  | 1.6101243 | 0          | 0.01277367 | 0.778 |

|          |                                                                                          |     |                    |                   |                    |                    |           |
|----------|------------------------------------------------------------------------------------------|-----|--------------------|-------------------|--------------------|--------------------|-----------|
| Positive | GO SPINDLE ORGANIZATION                                                                  | 161 | 0.68<br>2989<br>7  | 1.60<br>990<br>87 | 0                  | 0.01<br>2741<br>82 | 0.7<br>8  |
| Positive | GO REGULATION OF RNA SPLICING                                                            | 135 | 0.70<br>0421<br>87 | 1.60<br>903<br>8  | 0                  | 0.01<br>2988<br>55 | 0.7<br>89 |
| Positive | GO DNA REPLICATION DEPENDENT NUCLEOSOME ORGANIZATION                                     | 32  | 0.84<br>4062<br>7  | 1.60<br>772<br>23 | 0                  | 0.01<br>3525<br>98 | 0.8       |
| Positive | BMI1 DN MEL18 DN.V1 UP                                                                   | 141 | 0.69<br>3767<br>37 | 1.60<br>768<br>81 | 0                  | 0.01<br>3427<br>25 | 0.8       |
| Positive | GO PROTEIN LOCALIZATION TO CHROMOSOME TELOMERIC REGION                                   | 28  | 0.86<br>9691<br>7  | 1.60<br>649<br>86 | 0.00<br>1689<br>19 | 0.01<br>3717<br>11 | 0.8<br>08 |
| Positive | GO TERMINATION OF RNA POLYMERASE II TRANSCRIPTION                                        | 34  | 0.84<br>3249<br>6  | 1.60<br>599<br>43 | 0                  | 0.01<br>3861<br>65 | 0.8<br>12 |
| Positive | GO TERMINATION OF RNA POLYMERASE I TRANSCRIPTION                                         | 30  | 0.87<br>2740<br>03 | 1.60<br>389<br>86 | 0.00<br>4838<br>71 | 0.01<br>4705<br>98 | 0.8<br>36 |
| Positive | GO RESPIRATORY ELECTRON TRANSPORT CHAIN                                                  | 110 | 0.70<br>3997<br>85 | 1.60<br>326<br>64 | 0                  | 0.01<br>4894<br>46 | 0.8<br>39 |
| Positive | GO TRANSCRIPTION INITIATION FROM RNA POLYMERASE I PROMOTER                               | 35  | 0.83<br>0882<br>85 | 1.60<br>259<br>04 | 0.00<br>1569<br>86 | 0.01<br>4986<br>41 | 0.8<br>43 |
| Positive | GO RNA CAPPING                                                                           | 32  | 0.84<br>4818<br>53 | 1.60<br>256<br>45 | 0                  | 0.01<br>4898<br>61 | 0.8<br>44 |
| Positive | GO_MATURATION_OF_5_8S_RRNA_FROM_TRICISTRONIC_RRNA_TRANSCRIPT_SSU_RRNA_5_8S_RRNA_LSU_RRNA | 21  | 0.92<br>4677<br>67 | 1.60<br>248<br>16 | 0                  | 0.01<br>4820<br>42 | 0.8<br>45 |
| Positive | GO REGULATION OF TELOMERE MAINTENANCE                                                    | 76  | 0.74<br>1531<br>5  | 1.60<br>192<br>11 | 0.00<br>3072<br>2  | 0.01<br>4945<br>03 | 0.8<br>5  |

|          |                                                            |         |                    |                   |                    |                    |           |
|----------|------------------------------------------------------------|---------|--------------------|-------------------|--------------------|--------------------|-----------|
| Positive | GO RNA POLYADENYLATION                                     | 42      | 0.80<br>5063<br>84 | 1.60<br>081<br>49 | 0                  | 0.01<br>5233<br>86 | 0.8<br>56 |
| Positive | GO TRANSCRIPTION ELONGATION FROM RNA POLYMERASE I PROMOTER | 30      | 0.85<br>7086<br>7  | 1.59<br>995<br>41 | 0.00<br>1636<br>66 | 0.01<br>5493<br>2  | 0.8<br>66 |
| Positive | GO CYTOPLASMIC TRANSLATIONAL INITIATION                    | 30      | 0.84<br>8289<br>8  | 1.59<br>686<br>85 | 0                  | 0.01<br>6780<br>59 | 0.8<br>89 |
| Positive | GO PROTEIN MODIFICATION BY SMALL PROTEIN REMOVAL           | 28<br>4 | 0.64<br>3577<br>64 | 1.59<br>671<br>9  | 0                  | 0.01<br>6716<br>61 | 0.8<br>9  |
| Positive | GO NEGATIVE REGULATION OF CHROMOSOME ORGANIZATION          | 14<br>0 | 0.68<br>7392<br>1  | 1.59<br>627<br>8  | 0.00<br>1443       | 0.01<br>6783<br>21 | 0.8<br>93 |
| Positive | GO POSITIVE REGULATION OF MITOTIC CELL CYCLE               | 16<br>4 | 0.67<br>4304<br>66 | 1.59<br>268<br>43 | 0                  | 0.01<br>8101<br>15 | 0.9<br>06 |
| Positive | GO CLEAVAGE INVOLVED IN RRNA PROCESSING                    | 21      | 0.92<br>4677<br>8  | 1.59<br>227<br>26 | 0.00<br>1642<br>04 | 0.01<br>8198<br>03 | 0.9<br>07 |
| Positive | GO ATP SYNTHESIS COUPLED ELECTRON TRANSPORT                | 92      | 0.72<br>9253<br>2  | 1.59<br>035<br>46 | 0.00<br>2894<br>36 | 0.01<br>9061<br>45 | 0.9<br>18 |
| Positive | GO POSITIVE REGULATION OF GENE EXPRESSION EPIGENETIC       | 61      | 0.75<br>5031<br>05 | 1.59<br>034<br>59 | 0.00<br>3205<br>13 | 0.01<br>8937<br>68 | 0.9<br>18 |
| Positive | GO REGULATION OF SIGNAL TRANSDUCTION BY P53 CLASS MEDIATOR | 17<br>2 | 0.67<br>9533<br>36 | 1.58<br>985<br>52 | 0                  | 0.01<br>9049<br>99 | 0.9<br>21 |
| Positive | GO SNRNA PROCESSING                                        | 28      | 0.85<br>5130<br>26 | 1.58<br>843<br>55 | 0                  | 0.01<br>9566<br>63 | 0.9<br>28 |
| Positive | GO PROTEIN TARGETING TO MITOCHONDRION                      | 94      | 0.70<br>4563<br>8  | 1.58<br>646<br>25 | 0                  | 0.02<br>0315<br>25 | 0.9<br>31 |

|          |                                                                                                                                           |     |                    |                   |                    |                    |           |
|----------|-------------------------------------------------------------------------------------------------------------------------------------------|-----|--------------------|-------------------|--------------------|--------------------|-----------|
| Positive | GO MATURATION OF LSU RRNA                                                                                                                 | 19  | 0.93<br>1081<br>7  | 1.58<br>575<br>43 | 0                  | 0.02<br>0586<br>35 | 0.9<br>34 |
| Positive | GO REGULATION OF NUCLEAR DIVISION                                                                                                         | 204 | 0.65<br>8459<br>7  | 1.58<br>569<br>01 | 0                  | 0.02<br>0487<br>58 | 0.9<br>36 |
| Positive | GO NEGATIVE REGULATION OF RNA METABOLIC PROCESS                                                                                           | 48  | 0.77<br>5963<br>7  | 1.58<br>547<br>04 | 0.00<br>3021<br>15 | 0.02<br>0473<br>38 | 0.9<br>37 |
| Positive | GO_POSITIVE_REGULATION_OF_CYTOSOLIC_CALCIIUM_ION_CONCENTRATION_INVOLVED_IN_PHOSPHOLIPASE_C_ACTIVATING_G_PROTEIN_COUPLED_SIGNALING_PATHWAY | 31  | 0.85<br>3391<br>05 | 1.58<br>496<br>18 | 0                  | 0.02<br>0580<br>61 | 0.9<br>37 |
| Positive | GO POSITIVE REGULATION OF MITOTIC NUCLEAR DIVISION                                                                                        | 52  | 0.77<br>0136<br>95 | 1.58<br>438<br>9  | 0                  | 0.02<br>0715<br>3  | 0.9<br>39 |
| Positive | GO RESPONSE TO HEAT                                                                                                                       | 172 | 0.66<br>5229<br>9  | 1.58<br>231<br>65 | 0                  | 0.02<br>1823<br>22 | 0.9<br>52 |
| Positive | GO_NUCLEAR_TRANSCRIBED_MRNA_CATABOLIC_PROCESS_EXONUCLEOLYTIC                                                                              | 35  | 0.81<br>9842<br>3  | 1.58<br>016<br>06 | 0                  | 0.02<br>2859<br>07 | 0.9<br>6  |
| Positive | GO DOUBLE STRAND BREAK REPAIR                                                                                                             | 218 | 0.65<br>6472<br>56 | 1.57<br>823<br>04 | 0                  | 0.02<br>3685<br>7  | 0.9<br>66 |
| Positive | HALLMARK DNA REPAIR                                                                                                                       | 148 | 0.67<br>4483<br>84 | 1.57<br>729<br>8  | 0                  | 0.02<br>4089<br>95 | 0.9<br>66 |
| Positive | GO SPINDLE ASSEMBLY                                                                                                                       | 103 | 0.70<br>4189<br>8  | 1.57<br>707<br>13 | 0                  | 0.02<br>4083<br>18 | 0.9<br>66 |
| Positive | GO_REGULATION_OF_TELOMERE_MAINTENANCE_VIA_TELOMERE_LENGTHENING                                                                            | 59  | 0.76<br>0953<br>55 | 1.57<br>567<br>39 | 0.00<br>1543<br>21 | 0.02<br>4560<br>21 | 0.9<br>67 |
| Positive | GO DNA TEMPLATED TRANSCRIPTION INITIATION                                                                                                 | 244 | 0.64<br>8647<br>6  | 1.57<br>464<br>85 | 0                  | 0.02<br>5047<br>86 | 0.9<br>69 |



|          |                                                 |     |            |           |            |            |       |
|----------|-------------------------------------------------|-----|------------|-----------|------------|------------|-------|
| Positive | GO ORGANELLE FISSION                            | 433 | 0.61594635 | 1.5719799 | 0          | 0.02646919 | 0.976 |
| Positive | GO OXIDATIVE PHOSPHORYLATION                    | 119 | 0.68812704 | 1.5707544 | 0          | 0.02708778 | 0.979 |
| Positive | GO REGULATION OF CHROMOSOME ORGANIZATION        | 325 | 0.62944585 | 1.5704048 | 0          | 0.02712092 | 0.979 |
| Positive | GO NON RECOMBINATIONAL REPAIR                   | 85  | 0.71917796 | 1.5699334 | 0.00290698 | 0.02730055 | 0.979 |
| Positive | KRAS.LUNG UP.V1 UP                              | 135 | 0.6823618  | 1.5684451 | 0.00143472 | 0.02806452 | 0.988 |
| Positive | GO POSITIVE REGULATION OF RNA METABOLIC PROCESS | 69  | 0.727674   | 1.5679238 | 0.00311526 | 0.02822348 | 0.981 |
| Positive | GO MITOTIC METAPHASE PLATE CONGRESSION          | 44  | 0.7788939  | 1.5670682 | 0.00159744 | 0.02868408 | 0.982 |
| Positive | GO CELL CYCLE G2 M PHASE TRANSITION             | 260 | 0.6377466  | 1.566945  | 0          | 0.02857678 | 0.982 |
| Positive | GO MACROMOLECULE METHYLATION                    | 275 | 0.6361373  | 1.5652864 | 0          | 0.02952778 | 0.985 |
| Positive | GO CELL CYCLE DNA REPLICATION                   | 62  | 0.74493724 | 1.5621085 | 0.00468019 | 0.03168878 | 0.989 |
| Positive | GO POSITIVE REGULATION OF TELOMERE MAINTENANCE  | 50  | 0.75558466 | 1.5607074 | 0.00625978 | 0.03247551 | 0.989 |
| Positive | GO NEGATIVE REGULATION OF RNA SPLICING          | 25  | 0.8531647  | 1.5605124 | 0.00506757 | 0.03243004 | 0.989 |

|          |                                                                            |     |                    |                   |                    |                    |           |
|----------|----------------------------------------------------------------------------|-----|--------------------|-------------------|--------------------|--------------------|-----------|
| Positive | GO CHROMATIN REMODELING                                                    | 168 | 0.65<br>9942<br>4  | 1.56<br>044<br>21 | 0                  | 0.03<br>2298<br>61 | 0.9<br>92 |
| Positive | GO PROTEIN HETEROTETRAMERIZATION                                           | 53  | 0.75<br>7975<br>2  | 1.55<br>566<br>54 | 0.00<br>3174<br>6  | 0.03<br>5836<br>32 | 0.9<br>98 |
| Positive | GO SPLICEOSOMAL TRI SNRNP COMPLEX ASSEMBLY                                 | 26  | 0.84<br>3682<br>5  | 1.55<br>535<br>08 | 0.00<br>5076<br>14 | 0.03<br>5905<br>6  | 0.9<br>98 |
| Positive | GO PROTEIN TARGETING                                                       | 412 | 0.61<br>4654<br>24 | 1.55<br>293       | 0                  | 0.03<br>7802<br>46 | 0.9<br>98 |
| Positive | GO NEGATIVE REGULATION OF MRNA PROCESSING                                  | 29  | 0.83<br>7301<br>8  | 1.55<br>282<br>04 | 0                  | 0.03<br>7677<br>81 | 0.9<br>98 |
| Positive | GO RNA 5 END PROCESSING                                                    | 21  | 0.88<br>3679<br>2  | 1.54<br>956<br>42 | 0.00<br>1658<br>37 | 0.04<br>0045<br>41 | 0.9<br>99 |
| Positive | GO REGULATION OF SISTER CHROMATID SEGREGATION                              | 77  | 0.70<br>5856<br>7  | 1.54<br>912<br>94 | 0.00<br>2985<br>07 | 0.04<br>0206<br>34 | 0.9<br>99 |
| Positive | GO POSITIVE REGULATION OF TELOMERE MAINTENANCE VIA TELOMERE LENGTHENING    | 37  | 0.80<br>2995<br>2  | 1.54<br>795<br>34 | 0.00<br>3327<br>79 | 0.04<br>0911<br>73 | 0.9<br>99 |
| Positive | GO TELOMERE CAPPING                                                        | 52  | 0.75<br>0566<br>2  | 1.54<br>777       | 0.00<br>3058<br>1  | 0.04<br>0919<br>24 | 0.9<br>99 |
| Positive | GO NEGATIVE REGULATION OF NUCLEOBASE CONTAINING COMPOUND METABOLIC PROCESS | 147 | 0.66<br>1066<br>53 | 1.54<br>669<br>32 | 0                  | 0.04<br>1682<br>41 | 0.9<br>99 |
| Positive | GO CHROMOSOME CONDENSATION                                                 | 41  | 0.78<br>9240<br>66 | 1.54<br>554<br>77 | 0                  | 0.04<br>2539<br>98 | 0.9<br>99 |
| Positive | GO POSITIVE REGULATION OF CELL CYCLE PHASE TRANSITION                      | 107 | 0.68<br>7341<br>3  | 1.54<br>519<br>77 | 0.00<br>1424<br>5  | 0.04<br>2634<br>48 | 0.9<br>99 |

|          |                                                                     |     |                    |                   |                    |                    |           |
|----------|---------------------------------------------------------------------|-----|--------------------|-------------------|--------------------|--------------------|-----------|
| Positive | GO PROTEIN CONTAINING COMPLEX LOCALIZATION                          | 278 | 0.62<br>7792<br>2  | 1.54<br>457<br>86 | 0                  | 0.04<br>2901<br>96 | 0.9<br>99 |
| Positive | GO INTERACTION WITH SYMBIONT                                        | 79  | 0.71<br>1740<br>7  | 1.54<br>405<br>21 | 0.00<br>1594<br>9  | 0.04<br>3135<br>36 | 0.9<br>99 |
| Positive | GO TELOMERASE RNA LOCALIZATION                                      | 19  | 0.89<br>2030<br>3  | 1.54<br>315<br>56 | 0                  | 0.04<br>3707<br>2  | 1         |
| Positive | GO_POSITIVE_REGULATION_OF_TELOMERASE_RNA_LOCALIZATION_TO_CAJAL_BODY | 15  | 0.94<br>0059<br>24 | 1.54<br>123<br>96 | 0.00<br>1727<br>12 | 0.04<br>5271<br>2  | 1         |
| Positive | GO PYRIMIDINE NUCLEOTIDE BIOSYNTHETIC PROCESS                       | 44  | 0.77<br>4774<br>6  | 1.54<br>120<br>24 | 0.00<br>4918<br>03 | 0.04<br>5079<br>23 | 1         |
| Positive | GO DNA RECOMBINATION                                                | 263 | 0.62<br>6550<br>56 | 1.54<br>081<br>5  | 0                  | 0.04<br>5151<br>32 | 1         |
| Positive | GO CELLULAR RESPONSE TO HEAT                                        | 131 | 0.67<br>7553<br>8  | 1.53<br>993<br>49 | 0                  | 0.04<br>5745<br>08 | 1         |
| Positive | GO POSITIVE REGULATION OF DNA METABOLIC PROCESS                     | 146 | 0.65<br>7975<br>85 | 1.53<br>936<br>02 | 0.00<br>1367<br>99 | 0.04<br>6036<br>12 | 1         |
| Positive | GO RESPONSE TO INTERLEUKIN 7                                        | 39  | 0.77<br>9373<br>9  | 1.53<br>814<br>89 | 0.00<br>8319<br>47 | 0.04<br>7062<br>99 | 1         |
| Positive | GO REGULATION OF MRNA CATABOLIC PROCESS                             | 193 | 0.63<br>8302<br>7  | 1.53<br>809<br>1  | 0                  | 0.04<br>6890<br>87 | 1         |
| Positive | GO INTERSTRAND CROSS LINK REPAIR                                    | 48  | 0.74<br>5106       | 1.53<br>700<br>57 | 0.00<br>4622<br>5  | 0.04<br>7778<br>62 | 1         |
| Positive | GO TRANSCRIPTION PREINITIATION COMPLEX ASSEMBLY                     | 42  | 0.77<br>9456       | 1.53<br>600<br>17 | 0.00<br>7936<br>51 | 0.04<br>8527<br>04 | 1         |

|          |                                                  |    |                    |                   |                    |                    |   |
|----------|--------------------------------------------------|----|--------------------|-------------------|--------------------|--------------------|---|
| Positive | GO ALTERNATIVE MRNA SPLICING VIA SPLICEOSOME     | 76 | 0.70<br>2358<br>4  | 1.53<br>497<br>22 | 0.00<br>2985<br>07 | 0.04<br>9215<br>57 | 1 |
| Positive | GO NUCLEOSIDE MONOPHOSPHATE BIOSYNTHETIC PROCESS | 44 | 0.76<br>8533<br>95 | 1.53<br>418<br>21 | 0.00<br>1631<br>32 | 0.04<br>9799<br>48 | 1 |
