# Supplementary material
Source: PubMed Central journal article supplement (PMC11308298)

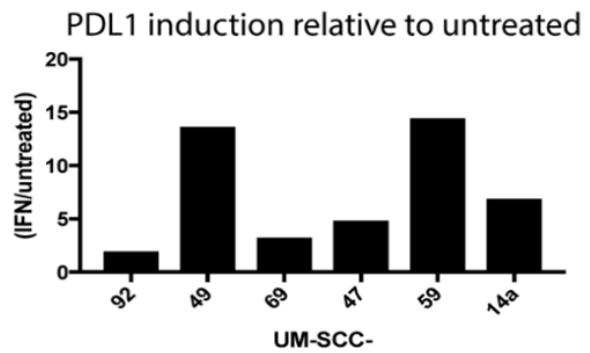

S. Fig 1

**fgf2**

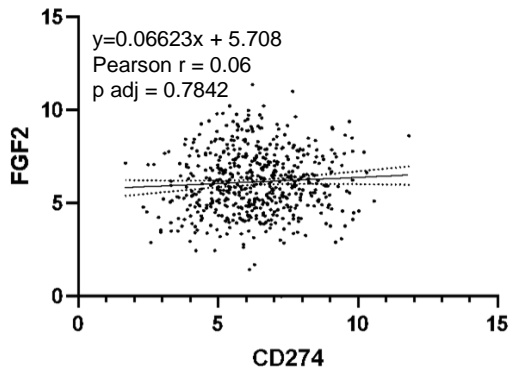

**nfkbia**

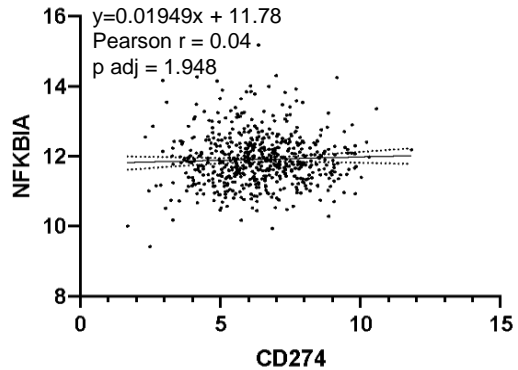

**il17a**

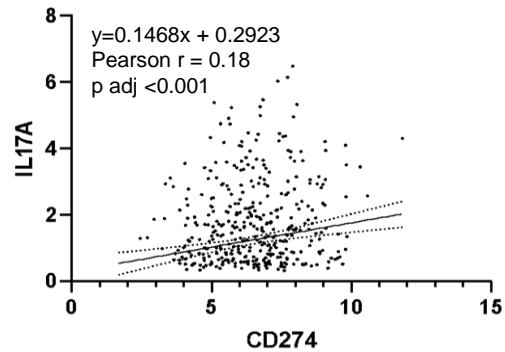

S. Fig 2

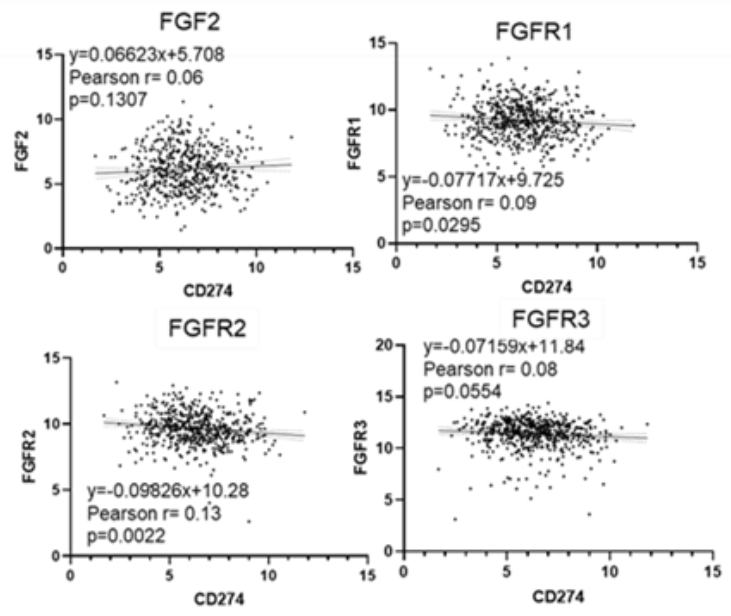

S. Fig 3

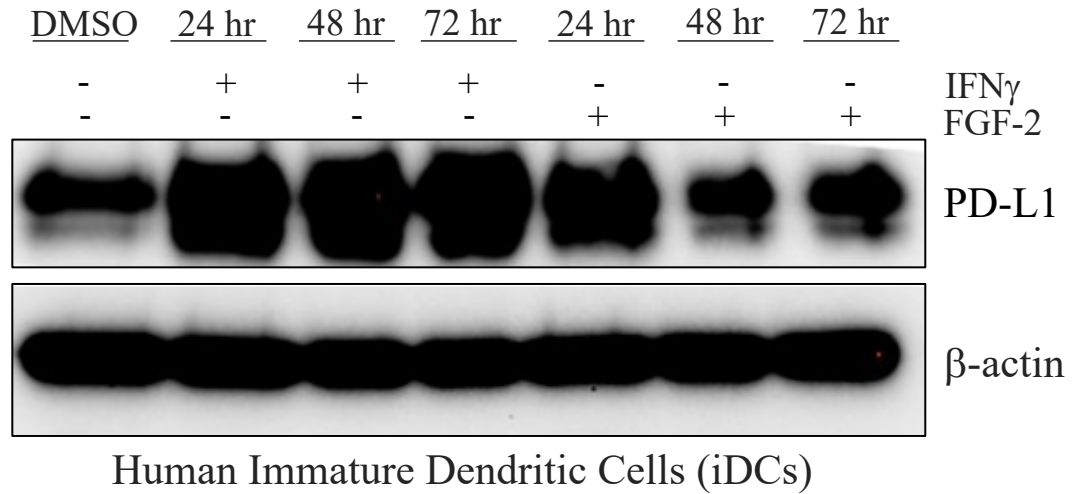

S. Fig 4

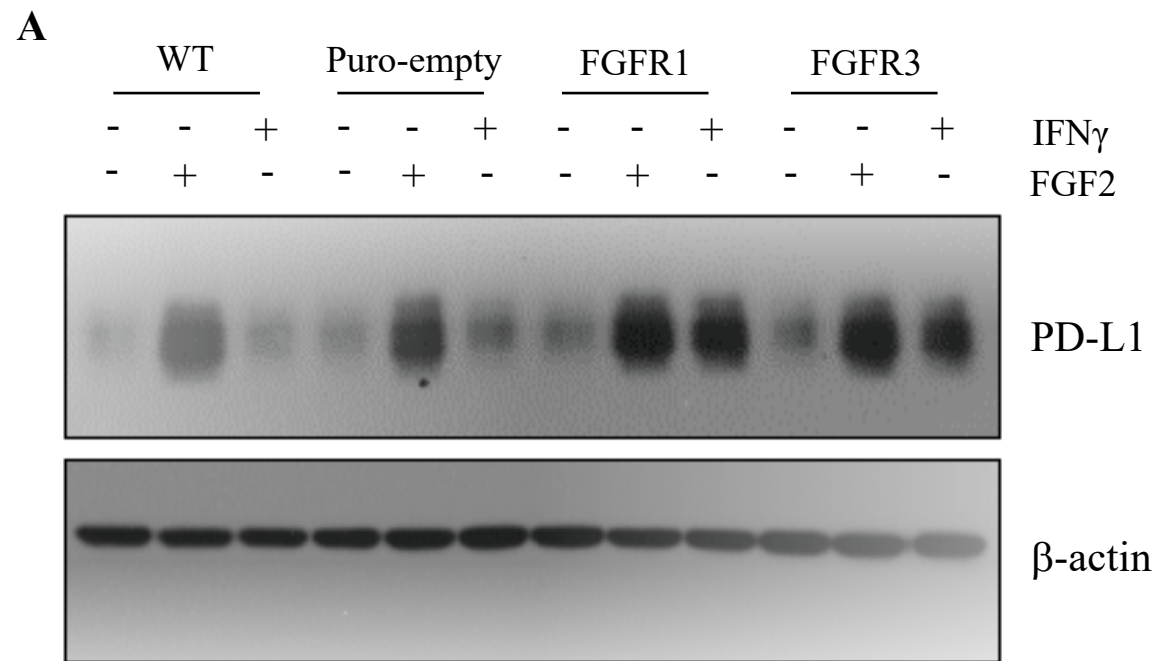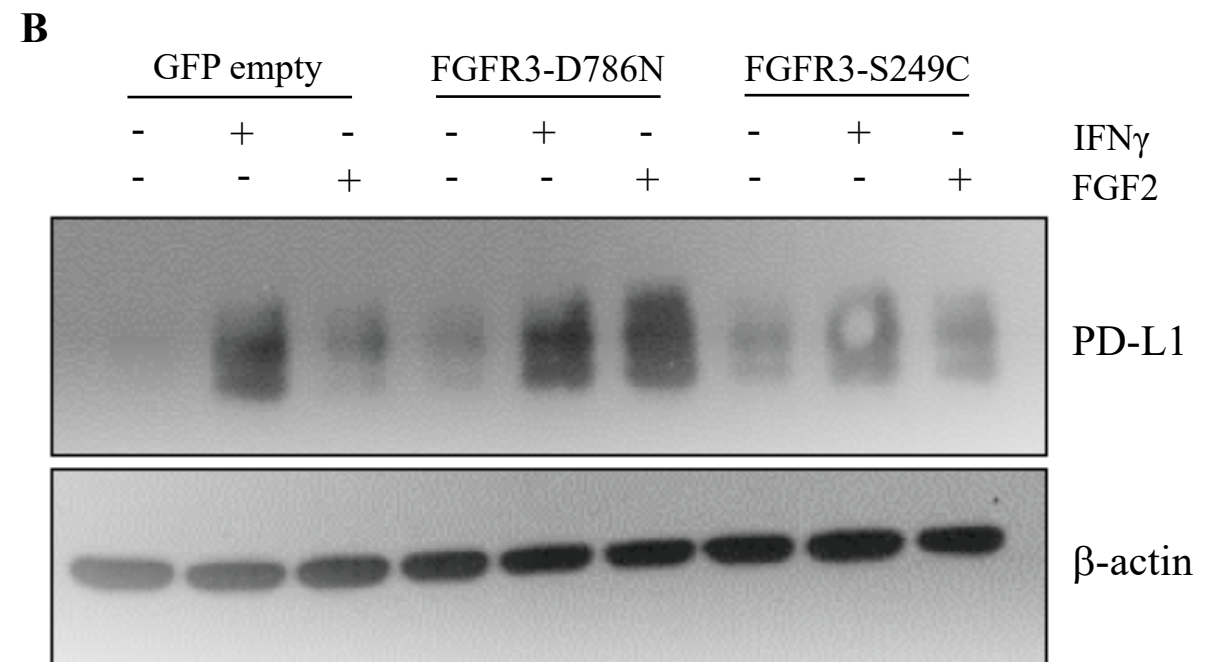

S. Fig 5

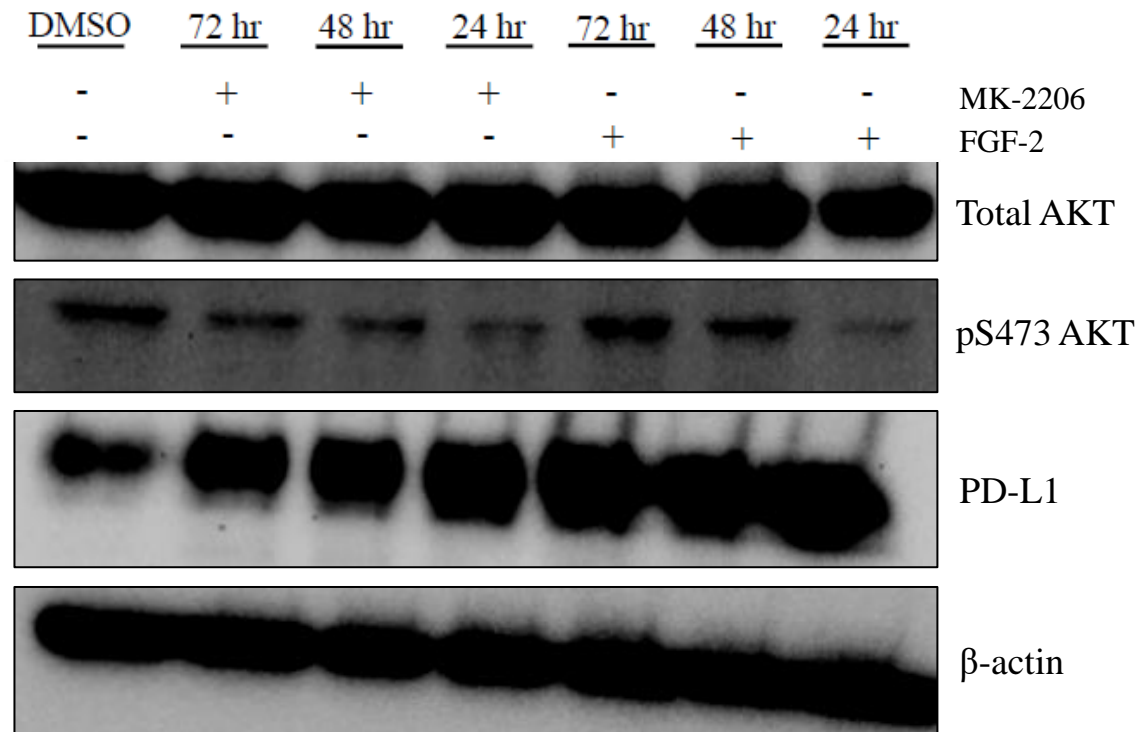

S. Fig 6

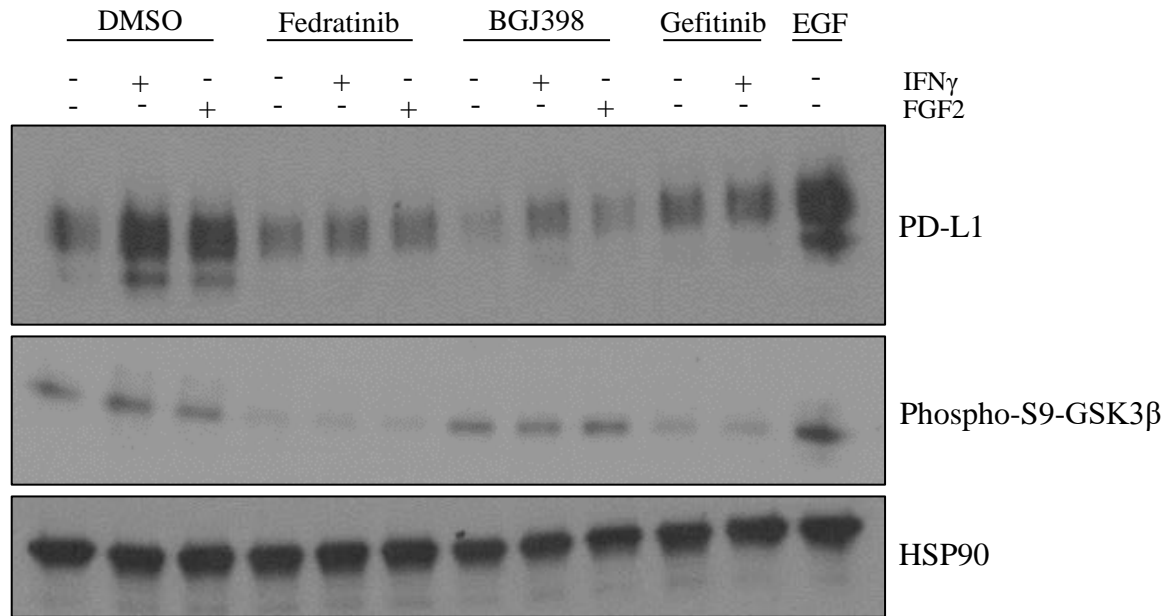

S. Fig 7

Supplement: NIHMS1998622-supplement-1.pdf [file NIHMS1998622-supplement-1.pdf]
